# Supplementary material for: A “MOFs plus MOFs” strategy toward Co–Mo2N tubes for efficient electrocatalytic overall water splitting
Source: Royal Society of Chemistry journal article supplement (doi:10.1039/c8ta07906d), 2018-01-01
Supplement: c8ta07906d1.pdf [file c8ta07906d1.pdf]

## Supporting Information

A “MOFs plus MOFs” strategy toward Co-Mo<sub>2</sub>N tubes for efficient electrocatalytic overall water splitting

Xia Shi, Aiping Wu, Haijing Yan, Lin Zhang, Chungui Tian\*, Lei Wang and Honggang Fu\*

Key Laboratory of Functional Inorganic Material Chemistry, Ministry of Education, Heilongjiang University, Harbin 150080, China

E-mail: fuhg@vip.sina.com; fuhg@hlju.edu.cn; chunguitianhq@163.com

## Contents

- 1 **Figure S1.** The optical photographs of products including Mo-MOFs (a); ZIF-67/Mo-MOFs-2 (b); S-2-T5 (c) and ZIF-67 (d), respectively.
- 2 **Figure S2.** The low-magnification of TEM images of ZIF-67/Mo-MOFs-2 precursor shown in different areas of TEM grid.
- 3 **Figure S3.** (a) The XPS survey spectrum and the high-resolution XPS spectra of (b) Mo 3d, (c) Co 2p and (d) N 1s for ZIF-67/Mo-MOFs-2 precursor.
- 4 **Figure S4.** N<sub>2</sub> adsorption-desorption isotherms and pore size distribution patterns for Mo-MOFs (a.b.); ZIF-67 (c.d.); ZIF-67/Mo-MOFs-2 (e.f.);
- 5 **Figure S5.** SEM images of the synthesized (a) ZIF-67/Mo-MOFs-1; (b) ZIF-67/Mo-MOFs-3.
- 6 **Figure S6.** XRD patterns of S-1-T5 and S-3-T5.
- 7 **Figure S7.** XRD patterns of (a) Mo-MOFs-T5; (b) ZIF-67-T5.
- 8 **Figure S8.** TEM images of the Co-Mo<sub>2</sub>N.
- 9 **Figure S9.** SEM, TEM, HRTEM images (a-c) of the Mo-MOFs-T5 and (d-f) of ZIF-67-T5.
- 10 **Figure S10.** The XPS survey spectrum (a) and the high-resolution XPS spectra of Mo 3d (b) and N 1s (c) in Mo-MOFs-T5.
- 11 **Figure S11.** (a) The XPS survey spectrum and the high-resolution XPS spectra (b) of Co 2p and (c) N 1s in ZIF-67-T5.
- 12 **Figure S12.** N<sub>2</sub> adsorption-desorption isotherms and pore size distribution patterns for (a, b) Mo-MOFs-T5, (c, d) ZIF-67-T5, (e, f) S-2-T5.
- 13 **Figure S13.** SEM images of the S-2-T4 (a); S-2-T6 (b); S-1-T5 (c); S-3-T5 (d).
- 14 **Figure S14.** XRD patterns of S-2-T4 and S-2-T6.
- 15 **Figure S15.** (a) Polarization curves, (b) Tafel plots of the S-1-T5, S-2-T5 and S-3-T5 at 1.0 M KOH, respectively.
- 16 **Figure S16.** (a) Polarization curves, (b) Tafel plots of the S-2-T4, S-2-T5 and S-2-T6 at 1.0 M KOH, respectively.
- 17 **Figure S17.** Calculation of exchange current density of S-2-T5, Mo-MOFs-T5 and ZIF-67-T5.
- 18 **Figure S18.** (a) Polarization curves and (b) Tafel plots of S-2-T5, Mo-MOF-T5, ZIF-67-T5 and Pt/C in 1 M KOH for the HER at a scan rate of 5 mV s<sup>-1</sup>. (with IR compensation)

- 19 Figure S19.** Cyclic voltammograms (CVs) in the region of 0.85 V-0.185 V with the different rates for (a) Mo-MOFs-T5; (c) ZIF-67-T5; (e) S-2-T5; (g) S-2-T4; (i) S-2-T6; (k) S-1-T5; (m) S-3-T5 in 1.0 M KOH. The capacitive current at 0.135 V as a function of scan rate for (b) Mo-MOFs-T5; (d) ZIF-67-T5; (f) S-2-T5; (h) S-2-T4; (j) S-2-T6; (l) S-1-T5; (n) S-3-T5, respectively ( $\Delta j_0 = j_a - j_c$ ).
- 20 Figure S20.** The cathodic (black open circle) and anodic (red open square) charging currents measured at 0.135V vs SCE plotted as a function of scan rate. (HER)
- 21 Figure S21.** The cathodic (black open circle) and anodic (red open square) charging currents measured at 1.215V vs SCE plotted as a function of scan rate. (OER)
- 22 Figure S22.** (a) CVs of S-2-T5, Mo-MOFs-T5 and ZIF-67-T5 in 1 M PBS (pH = 6.67) with a scan rate of 50 mV s<sup>-1</sup>. (b) Calculated TOF for S-2-T5, Mo-MOFs-T5 and ZIF-67-T5 in 1 M KOH.
- 23 Figure S23.** The Faradiac efficiency of (a) HER and (b) OER of S-2-T5.
- 24 Figure S24.** The work function drawings of (a) S-2-T5; (b) Mo-MOFs-T5; (c) ZIF-67-T5; (d) Pt black. The WF values of the S-2-T5, Mo-MOFs-T5, ZIF-67-T5 and Pt black are about 5.56 eV, 5.37 eV, 5.49 eV and 5.60 eV, respectively.
- 25 Figure S25.** (a) Polarization curves, (b) Tafel plots of the S-2-T4, S-2-T5 and S-2-T6 at 1.0 M KOH, respectively.
- 26 Figure S26.** (a) Polarization curves. (b) Tafel plots of the S-1-T5, S-2-T5 and S-3-T5 at 1.0 M KOH, respectively.
- 27 Figure S27.** (a) Polarization curves and (b) Tafel plots of S-2-T5 and Co+Mo<sub>2</sub>N in 1 M KOH for the HER at a scan rate of 5 mV s<sup>-1</sup>. (c) Polarization curves and (d) Tafel plots of S-2-T5 and Co+Mo<sub>2</sub>N in 1 M KOH for the OER at a scan rate of 5 mV s<sup>-1</sup>. (e) Linear sweeping voltammetry curve of S-2-T5 as OER and HER bifunctional catalyst in 1.0 M KOH for overall water splitting, and Co+Mo<sub>2</sub>N||Co+Mo<sub>2</sub>N for overall water splitting.
- 28 Figure S28.** Cyclic voltammograms (CVs) in the region of 1.164 V-1.264 V with the different rates for (a) Mo-MOFs-T5; (c) ZIF-67-T5; (e) S-2-T5; (g) S-2-T4; (i) S-2-T6; (k) S-1-T5; (m) S-3-T5 in 1.0 M KOH. The capacitive current at 0.135 V as a function of scan rate for (b) Mo-MOFs-T5; (d) ZIF-67-T5; (f) S-2-T5; (h) S-2-T4; (j) S-2-T6; (l) S-1-T5; (n) S-3-T5, respectively ( $\Delta j_0 = j_a - j_c$ ).

- 29 Figure S29.** (a) XRD pattern of S-2-T5 after HER test (500 CV cycles). (b)XRD pattern of S-2-T5 after OER test (500 CV cycles).
- 30 Figure S30.** The XPS of (a) Co 2p and (b) Mo 3d of S-2-T5 after HER test (500 CV cycles); (c) Co 2p and (d) Mo 3d of S-2-T5 after OER test (500 CV cycles).
- 31 Table S1.** The naming and experimental parameters of samples
- 32 Table S2.** Elements and content in ZIF-67/Mo-MOFs-2, S-2-T5, Mo-MOFs-T5 and ZIF-67-T5 samples tested by XPS.
- 33 Table S3.** Elements and content in ZIF-67/Mo-MOFs-2, S-2-T5, Mo-MOFs-T5 and ZIF-67-T5 samples tested by XPS.
- 34 Table S4.** BET surface areas of the prepared catalysts.
- 35 Table S5.** The summary of the catalytic performance of various catalysts for HER.
- 36 Table S6.** The summary of the catalytic performance of various catalysts for OER.
- 37 Table S7.** The summary of the catalytic performance of various catalysts for overall water splitting.
- 38 Table S8.** The summary of the catalytic performance of other non-noble metal HER electrocatalysts in alkaline electrolytes.
- 39 Table S9.** The summary of the catalytic performance of other non-noble metal OER electrocatalysts in alkaline electrolytes.
- 40 Table S10.** The summary of the catalytic performance of other non-noble metal overall water splitting electrocatalysts in alkaline electrolytes.

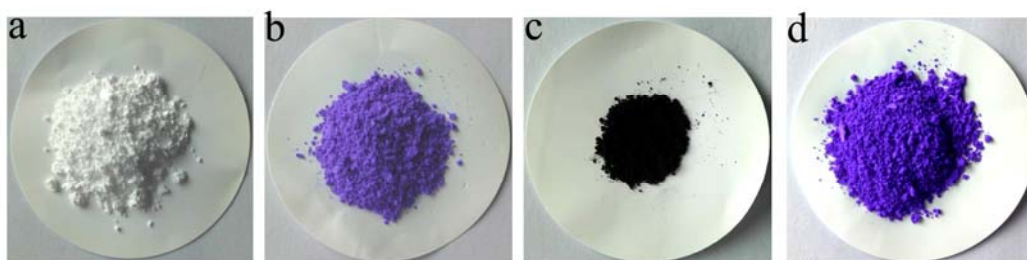

**Figure S1.** The optical photographs of products including Mo-MOFs (a); ZIF-67/Mo-MOFs-2 (b); S-2-T5 (c) and ZIF-67 (d), respectively.

The formation of samples from different stage can be reflected by colour change of solids. Typically, the Mo-MOFs show white color. After growth of ZIF-67, the color is changed to uniform purple close to that of ZIF-67, implying the formation of ZIF-67 on Mo-MOFs. The black color after nitridation is indicative to form Co-Mo<sub>2</sub>N hybrids. The ZIF-67 shows an expected purple.

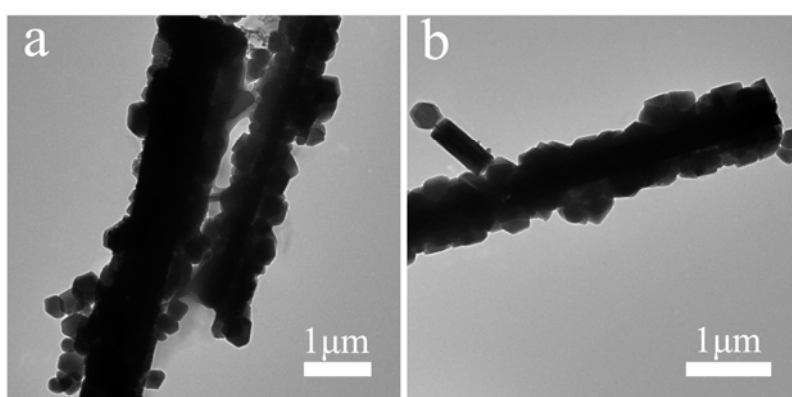

**Figure S2.** The low-magnification of TEM images of ZIF-67/Mo-MOFs-2 precursor shown in different areas of TEM grid. The results indicate that the ZIF-67 is growth on 1-D Mo-MOFs.

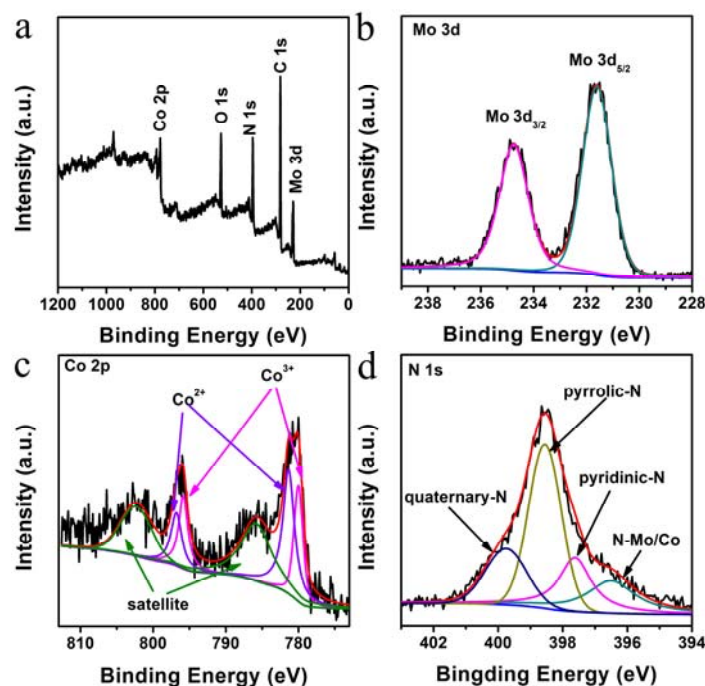

**Figure S3.** (a) The XPS survey spectrum and the high-resolution XPS spectra of (b) Mo 3d, (c) Co 2p and (d) N 1s for ZIF-67/Mo-MOFs-2 precursor.

Figure S3 shows XPS spectra of ZIF-67/Mo-MOFs-2. Figure S3a shows a wide-scan spectrum of the Mo-MOFs-T5. The sharp peaks at 284.0 eV, 395.5 eV, 528.0 eV, 228.9 eV and 778.0 eV are characteristic peaks of C 1s, N 1s, O 1s, Mo 3d and Co 2p, respectively. High resolution XPS spectra of Mo elements are shown in Figure S3b. The Mo 3d spectra can be fitted into two peaks. The peaks at the binding energies of 231.6 eV and 234.8 eV are attributed to Mo 3d<sub>5/2</sub> and Mo 3d<sub>3/2</sub> of Mo<sup>6+</sup> in Mo-MOFs.

Figure S3c shows the high-resolution spectrum of the cobalt element. The spin-orbit splitting is approximately 15.8 eV, which indicates the co-existence of Co (II) and Co (III) in the material. The peaks at about 781.4 eV and 796.8 eV corresponding to Co 2p<sub>3/2</sub> and Co 2p<sub>1/2</sub> of Co<sup>2+</sup> in ZIF-67, which are accompanied by a couple of satellite peaks located at 785.9 eV and 802.5 eV. The binding energies at about 780.0 eV and 795.9 eV are attributed to Co 2p<sub>3/2</sub> and Co 2p<sub>1/2</sub> of Co<sup>3+</sup> in Co<sub>2</sub>O<sub>3</sub>. The above result illustrates the formation of ZIF-67.

As shown in Figure S3d, the high-resolution spectrum of N element shows four deconvoluted peaks at 396.5, 397.7, 398.6 and 399.8 eV. The peaks located at 399.8 eV, 398.6 eV and 397.7 eV can be assigned to quaternary N, pyrrolic N and pyridinic N, respectively. Besides, the peak at 396.5 eV is the typical binding energy of N to Mo/Co. These results show the formation of ZIF-67/Mo-MOFs-2 precursor.

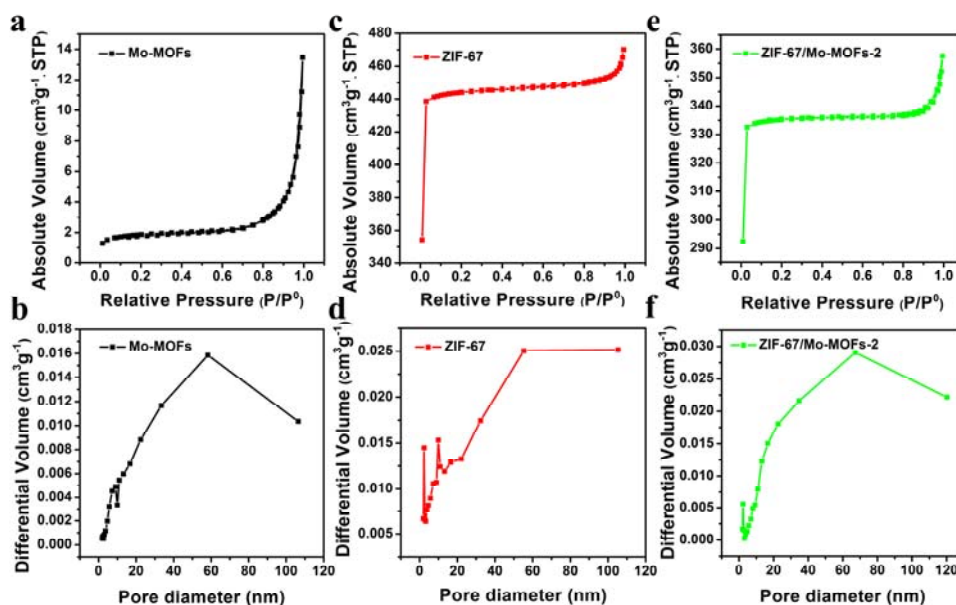

**Figure S4.**  $\text{N}_2$  adsorption-desorption isotherms and pore size distribution patterns for Mo-MOFs (a.b.); ZIF-67 (c.d.); ZIF-67/Mo-MOFs-2 (e.f.);

$\text{N}_2$  adsorption-desorption isotherms test results show that the Brunauer-Emmett-Teller (BET) specific surface area of ZIF-67/Mo-MOFs-2 is about  $1143 \text{ m}^2 \text{ g}^{-1}$ . The Mo-MOFs and ZIF-67 have shown  $S_{\text{BET}}$  of  $6 \text{ m}^2 \text{ g}^{-1}$  and  $1512 \text{ m}^2 \text{ g}^{-1}$ , respectively (Figure S4, Supporting Information). The high specific surface area of ZIF-67 is relative with its plentiful micro-pores. The specific surface area of ZIF-67/Mo-MOFs-2 is between ZIF-67 and Mo-MOFs, which also implies a successful combination of ZIF-67 and Mo-MOFs

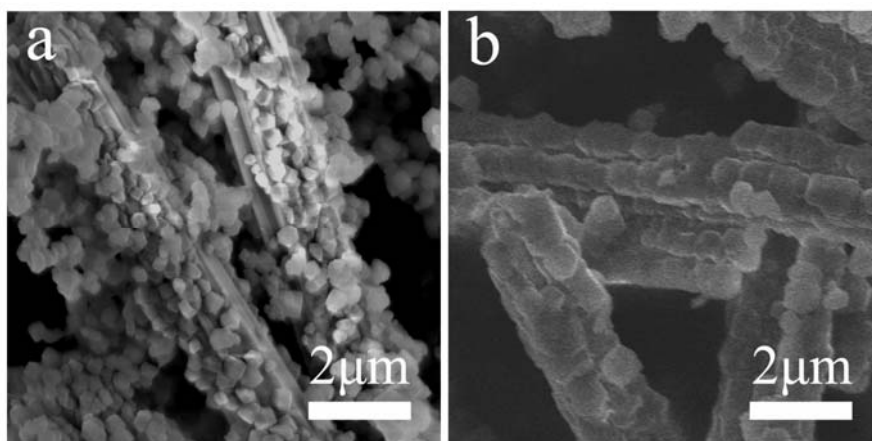

**Figure S5.** SEM images of the synthesized (a) ZIF-67/Mo-MOFs-1; (b) ZIF-67/Mo-MOFs-3.

The SEM test shows that the coverage and size of ZIF-67 can be increased with decreasing the ratio of Co/Mo source. However, the excessive increase of Co/Mo ratio can result in the formation of a large amount of free ZIF-67 that not loaded onto Mo-MOFs (Figure S5a). A suitable ratio of Co and Mo source can give hybrid with high coverage of ZIF-67 on Mo-MOFs. The tunable Co/Mo ratio is very important for their application.



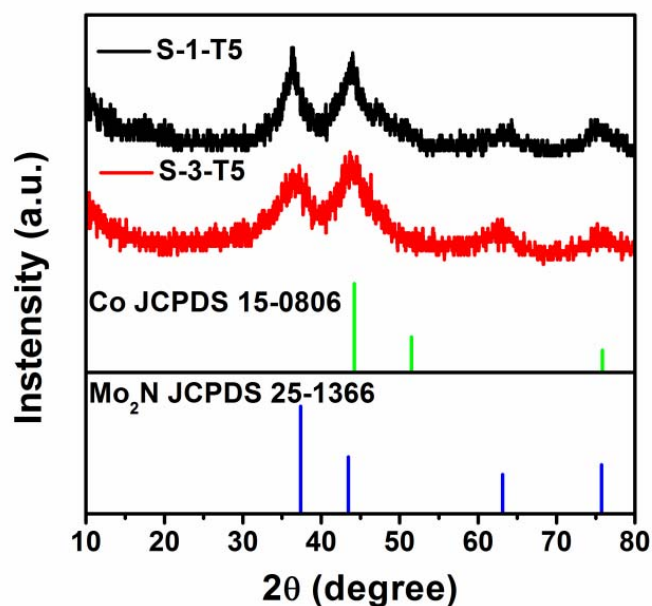

**Figure S6.** XRD patterns of S-1-T5 and S-3-T5.

The samples contained different ratio of ZIF-67 and Mo-MOFs, that is, ZIF-67/Mo-MOFs-1 (S-1-T5) and ZIF-67/Mo-MOFs-3 (S-3-T5) were calcinated at 500 °C under  $\text{NH}_3$  to given S-1-T5 and S-3-T5. The samples exhibit XRD diffraction peaks at  $2\theta = 36.35^\circ$ ,  $43.97^\circ$ ,  $63.18^\circ$  and  $75.74^\circ$ , indexing to the  $\text{Mo}_2\text{N}$  (JCPDS No. 25-1366) and Co (JCPDS No. 15-0806). The XRD tests indicated that the diffraction peak located at  $43.97^\circ$  (Co metal) degree increase with the increase ratio of ZIF-67/Mo-MOFs in the precursor. There are no diffractions corresponding to additional Co species ( $\text{CoO}_x$  or  $\text{CoN}_x$ ) besides the diffraction of metal Co. The results indicated that we can prepare the formation of Co- $\text{Mo}_2\text{N}$  with tunable ratio.

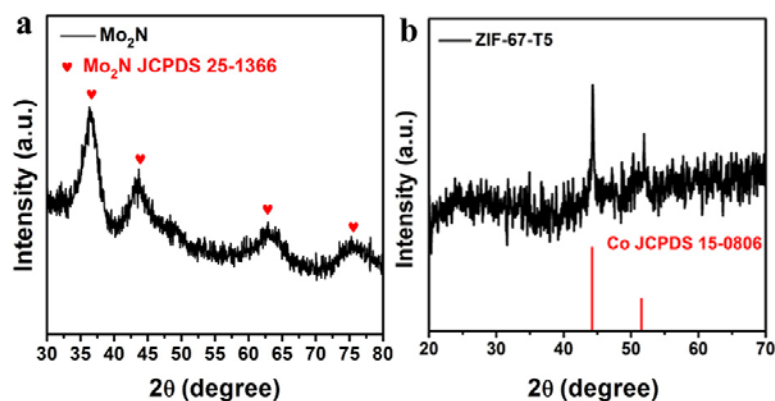

**Figure S7.** XRD patterns of (a) Mo-MOFs-T5; (b) ZIF-67-T5.

Figure S7 shows the XRD patterns of Mo-MOFs-T5 and ZIF-67-T5. The characteristic peaks of the Mo-MOFs-T5 were found to match the characteristic peaks of  $\text{Mo}_2\text{N}$  (JCPDS No. 25-1366). The XRD results of ZIF-67-T5 indicate the formation of metal Co (JCPDS No. 15-0806).

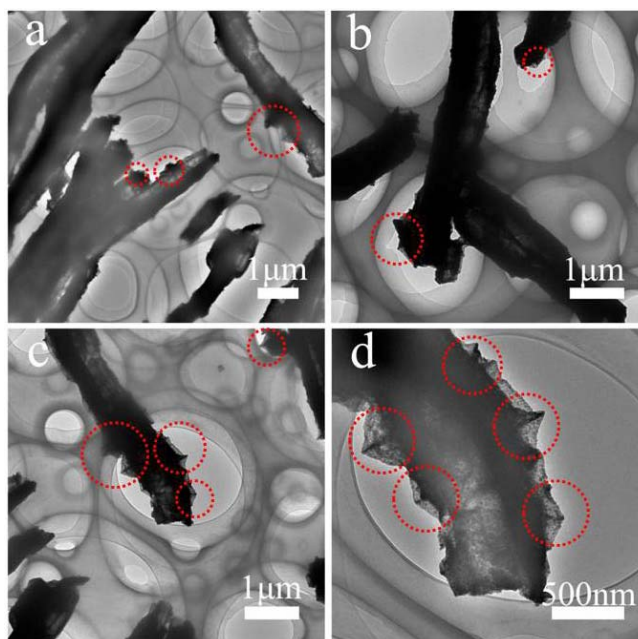

**Figure S8.** TEM images of the Co- $\text{Mo}_2\text{N}$ . The marked areas show obviously the growth of Co on 1-D  $\text{Mo}_2\text{N}$ .

Figures S8 shows that the Co- $\text{Mo}_2\text{N}$  from different area of TEM grid. We can see the formation of hollow tubes in large areas. In addition, we can observe the polyhedron derived from ZIF-67 in high-magnification TEM images (red ring position). The polyhedrons are not obvious in some areas, which should be relative with the unsuitable place for TEM observe or small size of ZIF-67 precursor.

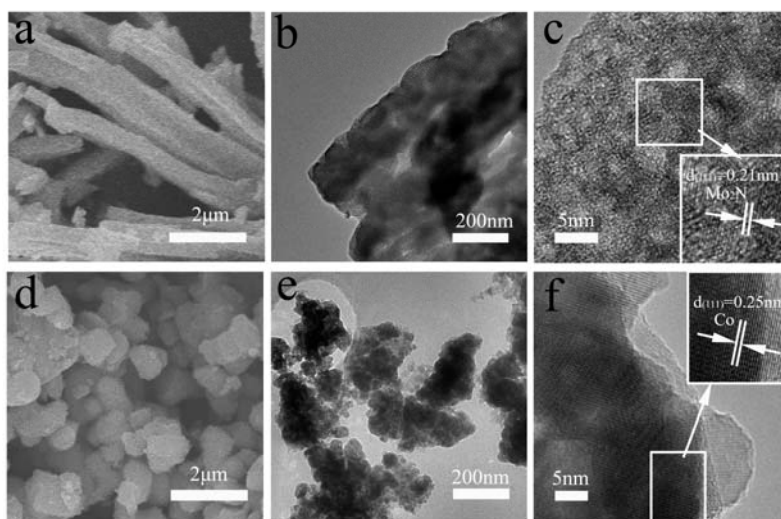

**Figure S9.** SEM, TEM, HRTEM images (a-c) of the Mo-MOFs-T5 and (d-f) of ZIF-67-T5.

Figure S9 shows SEM and TEM images of Mo-MOFs-T5 and ZIF-67-T5. As can be seen from Figure S9a-b, the Mo-MOFs-T5 have show 1-D structure with rough surface, which is different with the original Mo-MOFs with smooth surface. The change implies the formation of  $\text{Mo}_2\text{N}$ . The TEM image (Figure S9c) shows the lattice fringe of 0.21 nm associated with (111) crystal plane of  $\text{Mo}_2\text{N}$  (JCPDS No.25-1366). The HRTEM have also shown the presence of some pore on Mo-MOFs-T5 surface, which is different with the coarse surface on Co- $\text{Mo}_2\text{N}$ . The material derived from ZIF-67 shows irregular morphology, which should due to that the high temperature calcination under  $\text{NH}_3$  makes the collapsing of the sample. The high-resolution TEM of ZIF-67-T5 shows a lattice spacing of 0.25 nm, corresponding to (111) crystal plane of metallic Co (JCPDS No.15-0806).

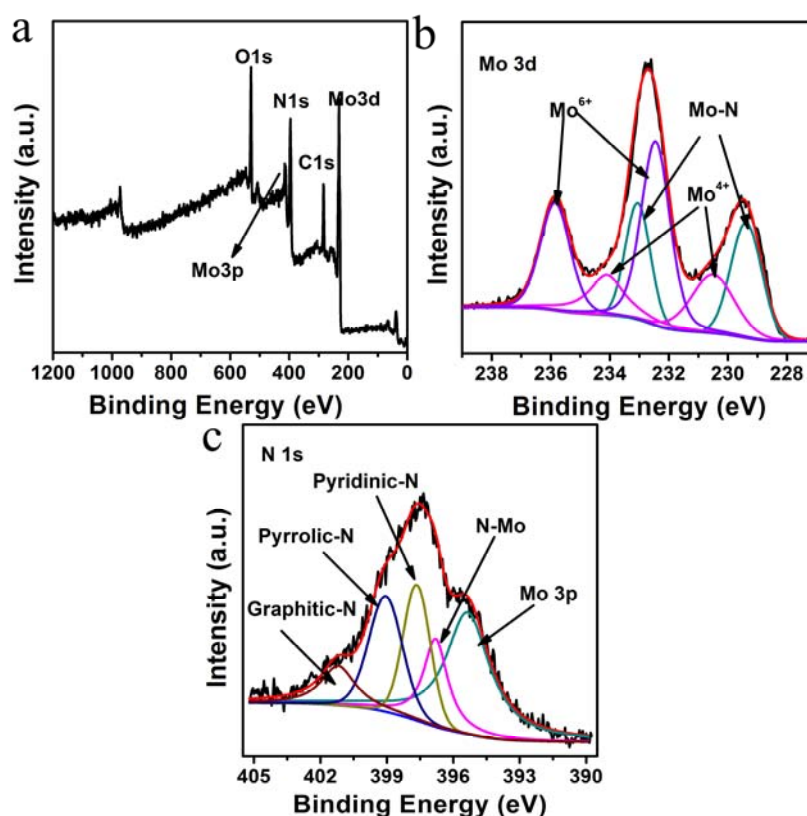

**Figure S10.** The XPS survey spectrum (a) and the high-resolution XPS spectra of Mo 3d (b) and N 1s (c) in Mo-MOFs-T5.

Figure S10a shows a wide-scan spectrum of the Mo-MOFs-T5. The sharp peaks at 285.3 eV, 395.5 eV, 528.3 eV, 228.9 eV and 412.5 eV are indexed as the characteristic peaks of C 1s, N 1s, O 1s, Mo 3d and Mo 3p, respectively. The high resolution XPS spectra of the Mo element (Figure S10b) shows that the Mo 3d spectra can be fitted into six peaks. The peaks at the binding energies of 230.5 eV and 234.2 eV are classified as Mo 3d<sub>5/2</sub> and Mo 3d<sub>3/2</sub> of Mo<sup>4+</sup> in MoO<sub>2</sub> and the peaks at the binding energies of 232.5 eV and 235.9 eV are attributed to Mo 3d<sub>5/2</sub> and Mo 3d<sub>3/2</sub> of Mo<sup>6+</sup> in MoO<sub>3</sub>. The binding peaks at 229.4 eV and 233.1 eV are defined as the binding energies of the Mo-N bond in Mo<sub>2</sub>N, which shows the formation of nitride. The XPS results of Mo-MOFs-T5 are consistent with that of Mo<sub>2</sub>N reported. As shown in Figure S10c, the high-resolution spectrum of the N element can be deconvoluted into five peaks at 395.4, 396.8, 397.6, 399.1 and 401.2 eV. Firstly, 401.2 eV, 399.1 eV and 397.6 eV can be assigned to graphitic N, pyrrolic N and pyridinic N, respectively. The peak at 396.8 eV is the typical binding energies of N combined with Mo, which shows the formation of nitrides. The above data further indicate the formation of Mo<sub>2</sub>N.

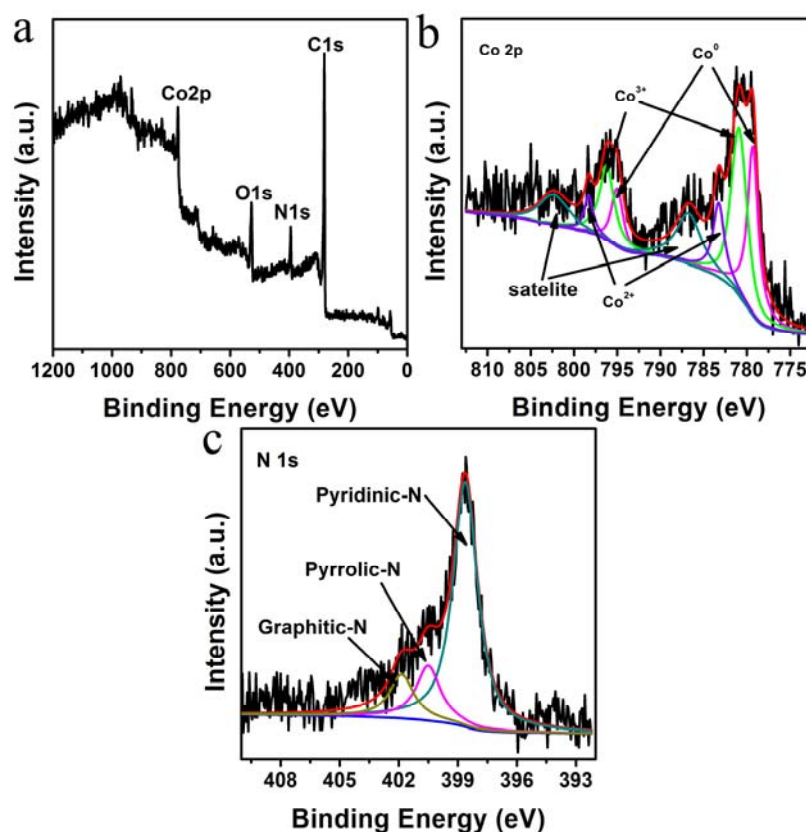

**Figure S11.** (a) The XPS survey spectrum and the high-resolution XPS spectra (b) of Co 2p and (c) N 1s in ZIF-67-T5.

Figure S11a shows a wide-scan spectrum of the ZIF-67-T5. The sharp peaks at 279.7 eV, 392.6 eV, 528.3 eV and 776.9 eV are indexed as the characteristic peaks of C 1s, N 1s, O 1s and Co 2p, respectively. The above information suggesting the existence of carbon (C), nitrogen (N), oxygen (O) and cobalt (Co) elements on the surfaces of ZIF-67-T5.

As shown in Figure S11b, the high-resolution spectrum of Co element shows the spin-orbit splitting about 15.8 eV, which indicates the co-existence of the Co (II) and Co (III). The peaks at about 783.2 eV and 798.3 eV correspond to Co 2p<sub>3/2</sub> and Co 2p<sub>1/2</sub> of Co<sup>2+</sup> in CoO, respectively, which are accompanied by a couple of satellite peaks located at 786.7 eV and 802.3 eV. The binding energies at about 780.9 eV and 796.2 eV are attributed to Co 2p<sub>3/2</sub> and Co 2p<sub>1/2</sub> of Co<sup>3+</sup> in Co<sub>2</sub>O<sub>3</sub>. The peaks located at 779.3 eV and 795.0 eV in Co 2p spectrum is assigned to Co<sup>0</sup> 2p<sub>3/2</sub> and Co<sup>0</sup> 2p<sub>1/2</sub>, respectively. The presence of oxides should be ascribed to easy oxidation of metal Co under air. In the high-resolution spectrum of N element (Figure S11c), we can see three peaks at 401.9, 400.5 and 398.6 eV, which are assigned to graphitic N, pyrrolic N and pyridinic N, respectively.

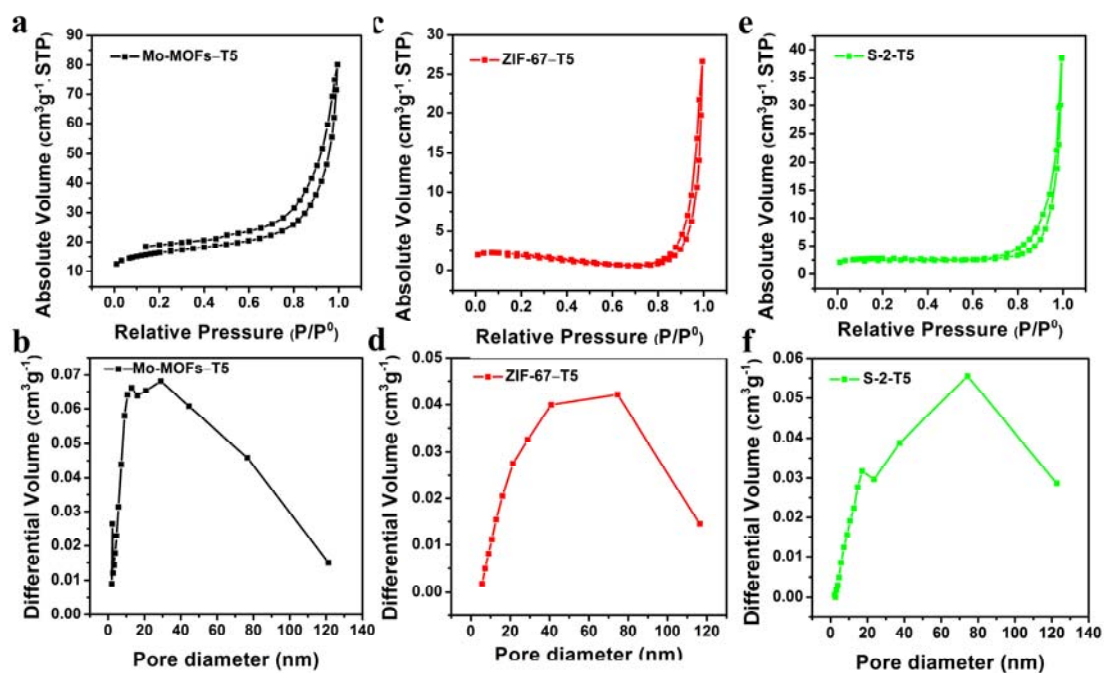

**Figure S12.**  $\text{N}_2$  adsorption-desorption isotherms and pore size distribution patterns for (a, b) Mo-MOFs-T5, (c, d) ZIF-67-T5, (e, f) S-2-T5.

The nitrogen adsorption-desorption isotherms test indicated that  $S_{\text{BET}}$  value of ZIF-67-T5 is about  $6 \text{ m}^2 \text{ g}^{-1}$ . The dramatic reduction in the specific surface area should be due to the collapse of the well-defined microporous structure of ZIF-67 caused by the nitrogenization. The Mo-MOFs-T5 has rod-like structure with a rough surface. Its specific surface area has slight increase compared to the precursor. The S-2-T5 ( $9 \text{ m}^2 \text{ g}^{-1}$ ) has shown a lower specific surface area than Mo-MOF-T5 ( $57 \text{ m}^2 \text{ g}^{-1}$ ). The decrease should be ascribed to the coverage of Co derived from ZIF-67 polyhedron on  $\text{Mo}_2\text{N}$ , which is an indicative for the formation of Co- $\text{Mo}_2\text{N}$  hybrid.

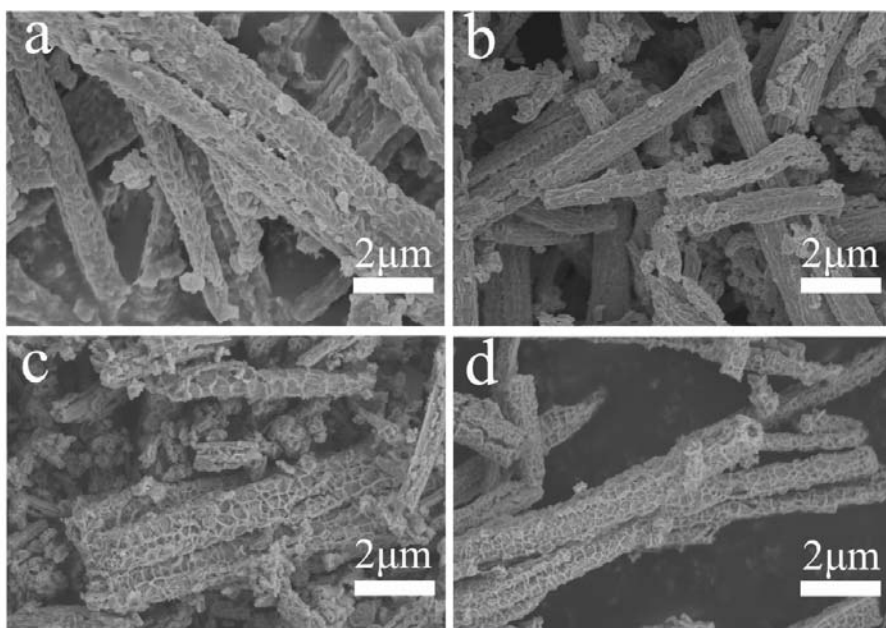

**Figure S13.** SEM images of the S-2-T4 (a); S-2-T6 (b); S-1-T5 (c); S-3-T5 (d).

The SEM images of different samples are shown in Figure S13. We can see all control samples, including S-2-T4 (a), S-2-T6 (b), S-1-T5 (c) and S-3-T5 (d), show the 1-D rod-like structure.



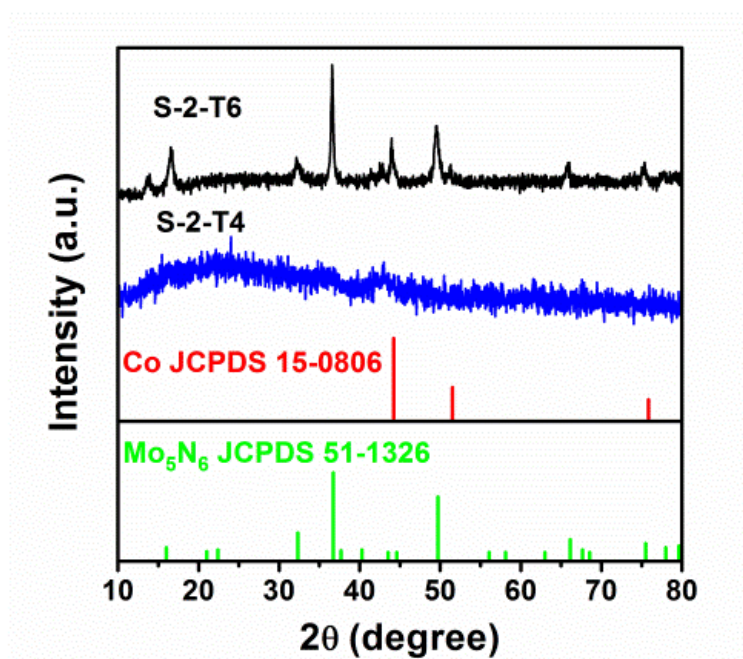

**Figure S14.** XRD patterns of S-2-T4 and S-2-T6.

Figure S14 shows the XRD patterns of S-2-T4 and S-2-T6 from the calcination of ZIF-67/Mo-MOF-2 at 400 and 600  $^\circ\text{C}$ , respectively. The XRD pattern of S-2-T4 shows very low diffraction peaks of Co metal, and there are no obvious peaks about  $\text{Mo}_2\text{N}$  phase. In the case of calcination at 600  $^\circ\text{C}$ , the crystallization phase of material are composed of Co and  $\text{Mo}_5\text{N}_6$ . The intensive peaks imply the good crystallinity and larger grain sizes. The results show the important effect of calcination temperature on the structure.



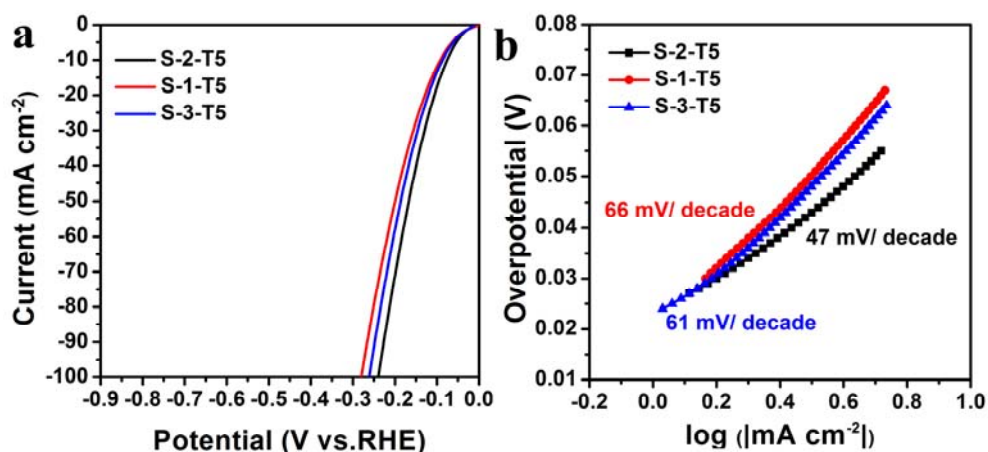

**Figure S15.** (a) Polarization curves, (b) Tafel plots of the S-1-T5, S-2-T5 and S-3-T5 at 1.0 M KOH, respectively.

The comparison shows that the HER performance of S-2-T5 is better than that of S-1-T5 and S-3-T5. In the case of low Co/Mo ratio, the coverage of Co on  $\text{Mo}_2\text{N}$  is very low, resulting in little contacted interface of Co and  $\text{Mo}_2\text{N}$  (Generally speaking, the interface of heterojunction is more active than other sites), and consequently, the lower activity for HER. The high ratio of Co and Mo can make the formation of free Co species derived from free ZIF-67.

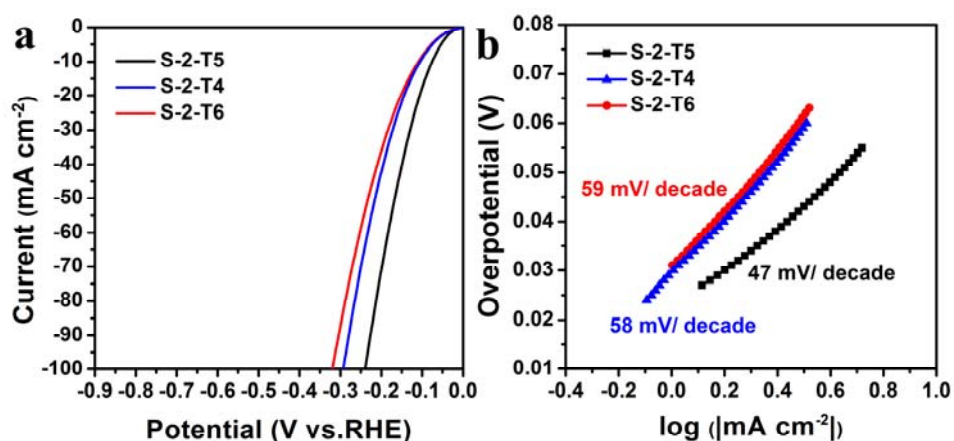

**Figure S16.** (a) Polarization curves, (b) Tafel plots of the S-2-T4, S-2-T5 and S-2-T6 at 1.0 M KOH, respectively.

The comparison shows that the HER performance of S-2-T5 is better than that of S-2-T4 and S-2-T6. The calcination at low temperature is not favourable for the formation of Co and  $\text{Mo}_2\text{N}$ , while the high-treatment temperature can result in the excessive growth of sample. Both of them are not conducive to improve the catalytic activity. It can be concluded that the appropriate crystallinity and ratio of Co/Mo are great importance for the effective HER.

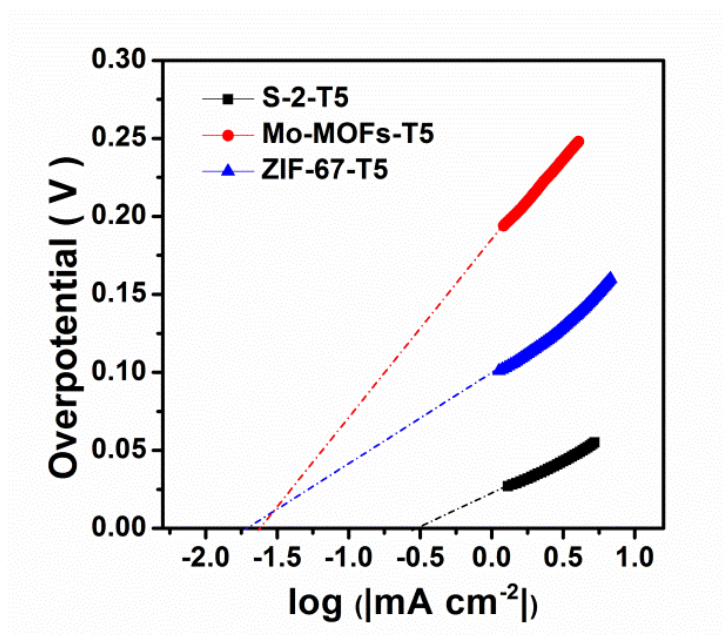

**Figure S17.** Calculation of exchange current density of S-2-T5, Mo-MOFs-T5 and ZIF-67-T5.

The exchange current density ( $j_0$ ) was calculated by using extrapolation method (Figure S17). At the overpotential of 0, the  $\log [j]$  values for S-2-T5, Mo-MOFs-T5 and ZIF-67-T5 are -0.52, -1.60 and -1.73, respectively. So, the  $j_0$  for S-2-T5 is about  $0.302 \text{ mA cm}^{-2}$ , much higher than Mo-MOFs-T5 ( $0.025 \text{ mA cm}^{-2}$ ) and ZIF-67-T5 ( $0.019 \text{ mA cm}^{-2}$ ).

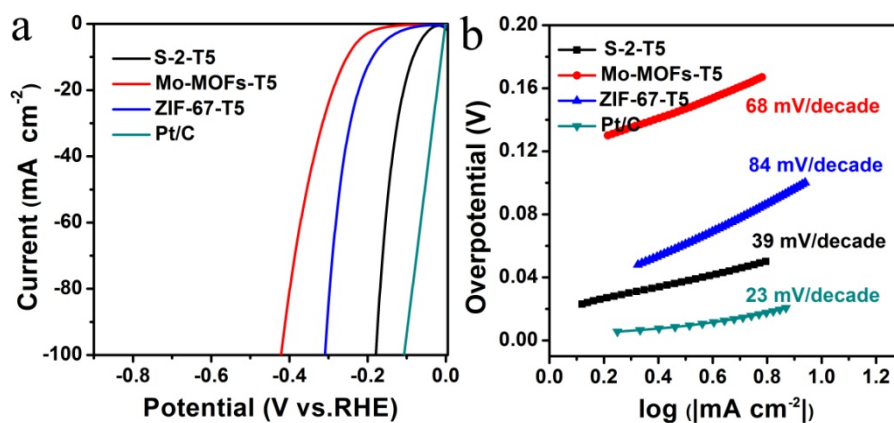

**Figure S18.** (a) Polarization curves and (b) Tafel plots of S-2-T5, Mo-MOF-T5, ZIF-67-T5 and Pt/C in 1 M KOH for the HER at a scan rate of 5 mV s<sup>-1</sup>. (with IR compensation)

We further performed IR compensation tests on S-2-T5, Mo-MOF-T5, ZIF-67-T5 and Pt/C (Figure S18). The results show the Tafel slopes are about 39, 68, 84 and 23 mV dec<sup>-1</sup> (1.0 M KOH) for S-2-T5, Mo-MOFs-T5, ZIF-67-T5 and Pt/C, respectively. And the S-2-T5 sample only requires a small overpotential of 73 mV to achieve the current densities of 10 mA cm<sup>-2</sup> which is superior to Mo-MOFs-T5 (252 mV) and ZIF-67-T5 (186 mV) and the state-of-the-art Pt/C (17 mV).

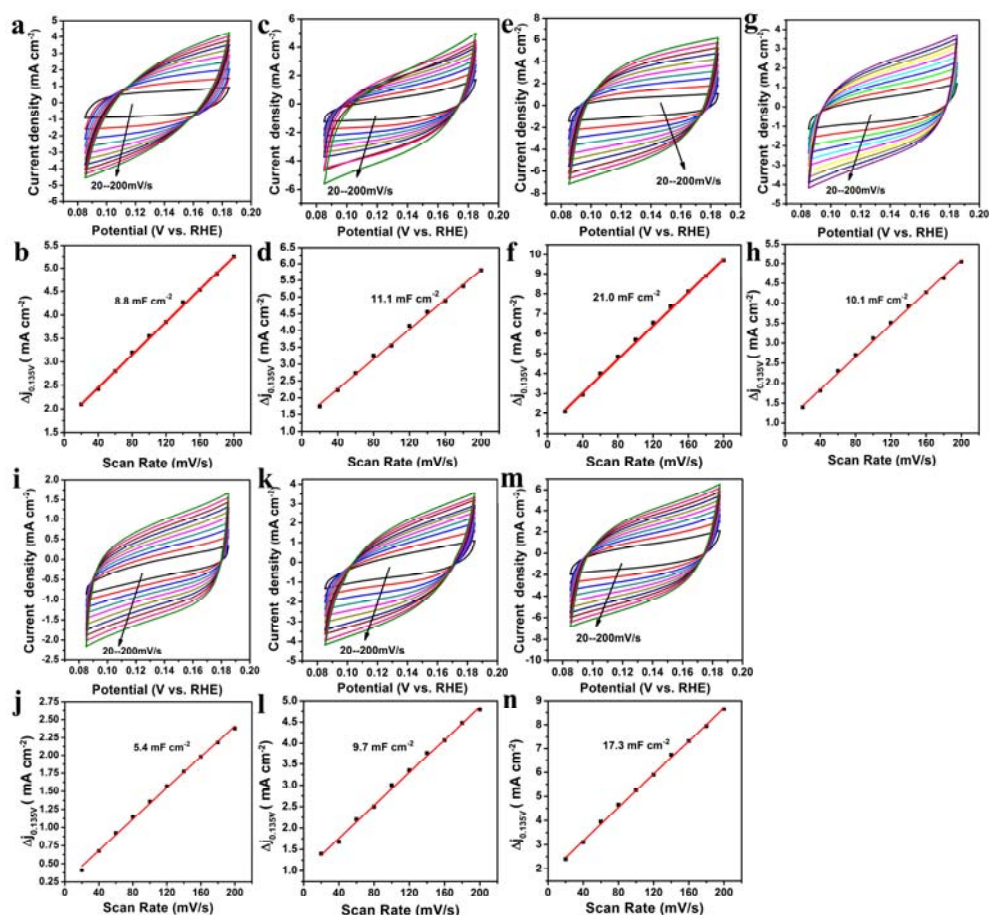

**Figure S19.** Cyclic voltammograms (CVs) in the region of 0.85 V-0.185 V with the different rates for (a) Mo-MOFs-T5; (c) ZIF-67-T5; (e) S-2-T5; (g) S-2-T4; (i) S-2-T6; (k) S-1-T5; (m) S-3-T5 in 1.0 M KOH. The capacitive current at 0.135 V as a function of scan rate for (b) Mo-MOFs-T5; (d) ZIF-67-T5; (f) S-2-T5; (h) S-2-T4; (j) S-2-T6; (l) S-1-T5; (n) S-3-T5, respectively ( $\Delta j_0 = j_a - j_c$ ).

The capacitance of S-2-T5 calculated based on active surface area is about 21.0 mF cm<sup>-2</sup>, much higher than ZIF-67-T5 (11.1 mF cm<sup>-2</sup>), Mo-MOFs-T5 (8.8 mF cm<sup>-2</sup>), S-2-T4 (10.1 mF cm<sup>-2</sup>), S-2-T6 (5.4 mF cm<sup>-2</sup>), S-1-T5 (9.7 mF cm<sup>-2</sup>) and S-3-T5 (17.3 mF cm<sup>-2</sup>).

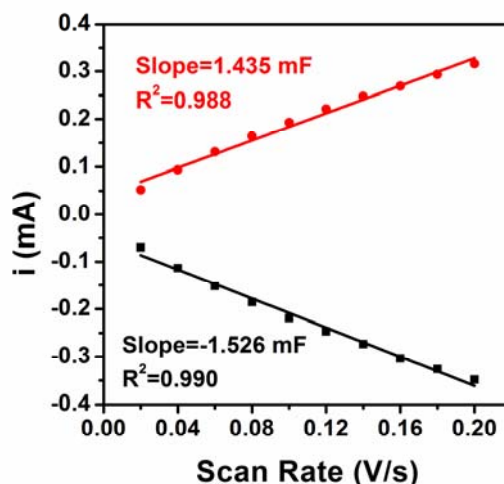

**Figure S20.** The cathodic (black open circle) and anodic (red open square) charging currents measured at 0.135V vs SCE plotted as a function of scan rate. (HER)

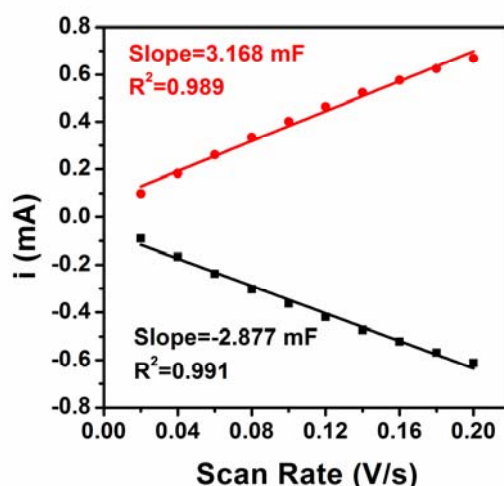

**Figure S21.** The cathodic (black open circle) and anodic (red open square) charging currents measured at 1.215V vs SCE plotted as a function of scan rate. (OER)

We have reviewed the literature on the relationship between the specific surface area of the material and the roughness factor.<sup>1,2</sup> By conducting the electrochemically active surface area test on the material, multiple CVs can then be performed at various scan rates for estimation of charging current ( $i_c$ ). The relation between  $i_c$ , the scan rate ( $v$ ), and the double-layer capacitance ( $C_{dl}$ ) is given in eq 1. Hence, the slope of  $i_c$  as a function of scan rate is a straight line and is equal to  $C_{dl}$ .

$$i_c = vC_{dl} \quad (1)$$

The  $C_{dl}$  of the Co-Mo<sub>2</sub>N hybrid HER and OER are 1.435 mF and 3.168 mF, respectively, which are converted to ECSA according to eq 2. A specific capacitance

( $C_s$ ) value  $C_s=0.040 \text{ mF cm}^{-2}$  in 1.0 M KOH is adopted from previous reports, and hence ECSA of the HER and OER of the Co-Mo<sub>2</sub>N hybrid were 35.9 mF and 79.2 mF, respectively.

$$\text{ECSA} = C_{\text{dl}}/C_s \quad (2)$$

Finally, the roughness factor (RF) is calculated on the basis of eq 3; given the geometric surface area (GSA) of working electrode (0.07065 cm<sup>2</sup>), the RF of the HER and OER of the Co-Mo<sub>2</sub>N hybrid were 508 and 1121 mF, respectively.

$$\text{RF} = \text{ECSA}/\text{GSA} \quad (3)$$

[1] C. C. L. McCrory, S. Jung, J. C. Peters and T. F. Jaramillo, J. Am. Chem. Soc., 2013, 135, 16977-16987.

[2] K. Akbar, J. H. Jeon, M. Kim, J. Jeong, Y. Yi and S.-H. Chun, ACS Sustainable Chem. Eng., 2018, 6, 7735-7742.

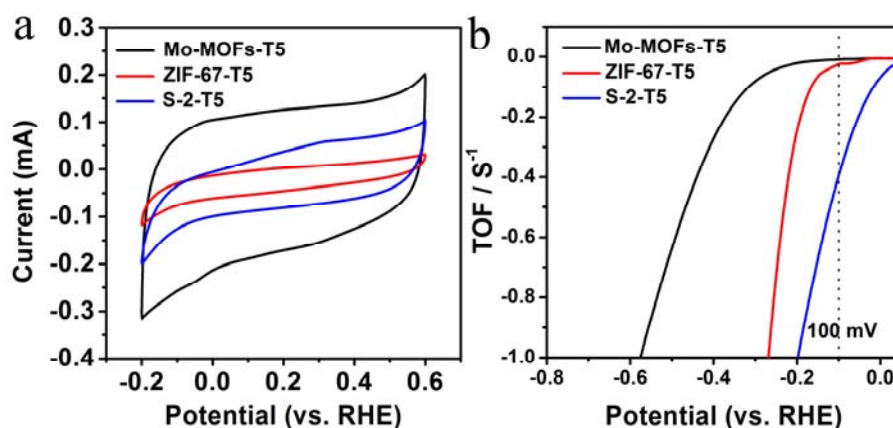

**Figure S22.** (a) CVs of S-2-T5, Mo-MOFs-T5 and ZIF-67-T5 in 1 M PBS (pH = 6.67) with a scan rate of 50 mV s<sup>-1</sup>. (b) Calculated TOF for S-2-T5, Mo-MOFs-T5 and ZIF-67-T5 in 1 M KOH.

The turnover frequency (TOF) value is an important parameter to evaluate the intrinsic activity of catalysts. For HER, the turnover frequency (TOF) is the number of H<sub>2</sub> molecules produced per second per active site. The number of active sites was examined by CV in a pH = 6.67 phosphate buffer with a scan rate of 50 mV s<sup>-1</sup>. As shown in Figure S19, the S-2-T5 has the highest TOF of 0.396 s<sup>-1</sup> per site at an overpotential of 100 mV, which is larger than that of 0.025 s<sup>-1</sup> and 0.009 s<sup>-1</sup> for ZIF-67-T5 and Mo-MOFs-T5, respectively.



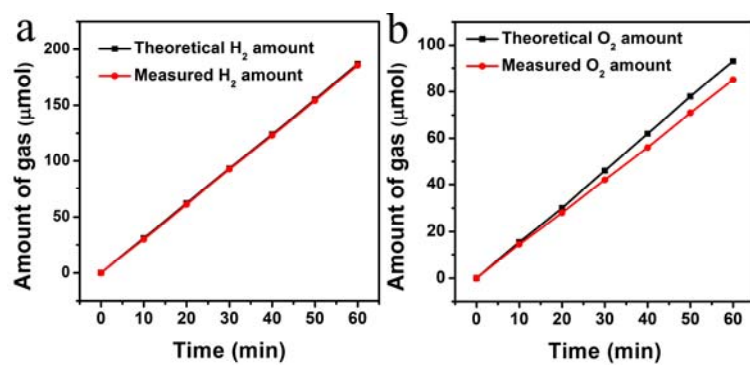

**Figure S23.** The Faradiac efficiency of (a) HER and (b) OER of S-2-T5.

The Faradiac efficiency of S-2-T5 for HER and OER is about 100% and 91% at 60 min of test.

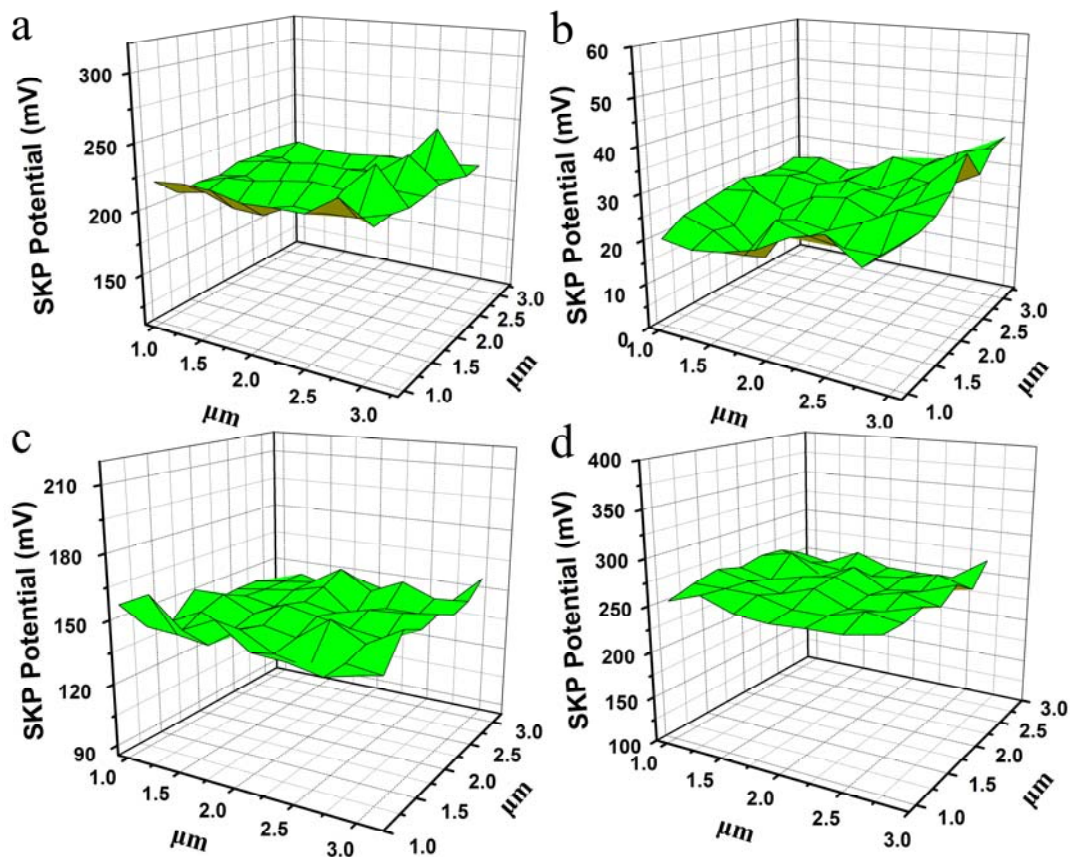

**Figure S24.** The work function drawings of (a) S-2-T5; (b) Mo-MOFs-T5; (c) ZIF-67-T5; (d) Pt black. The WF values of the S-2-T5, Mo-MOFs-T5, ZIF-67-T5 and Pt black are about 5.56 eV, 5.37 eV, 5.49 eV and 5.60 eV, respectively.

The work function ( $\phi$ ) of the material is calculated by the following formula:

$$\phi_{Au} - \eta_{Au} / 1000 = \phi - \eta / 1000$$

In which  $\phi_{Au}$  is the work function of Au,  $\eta_{Au} = -239.75$  eV.  $\phi$  is the work function of material,  $\eta$  is derived from the work function test data.

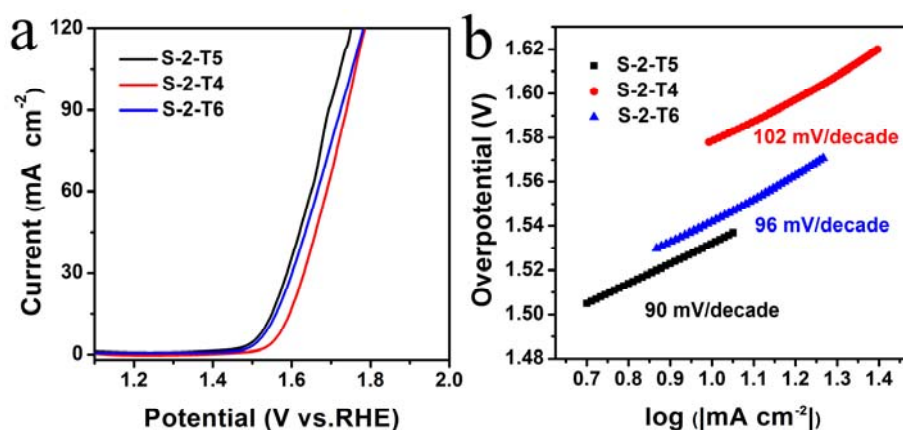

**Figure S25.** (a) Polarization curves, (b) Tafel plots of the S-2-T4, S-2-T5 and S-2-T6 at 1.0 M KOH, respectively.

The comparison shows that the OER performance of S-2-T5 is better than that of S-2-T4 and S-2-T6. The S-2-T5 affords overpotential of 302 mV at 10 mA cm<sup>-2</sup>, which are much lower than S-2-T4 (348 mV) and S-2-T6 (312 mV) (Figure S25a). The Tafel slope of S-2-T5 is 90 mV dec<sup>-1</sup>, which is also lower than S-2-T4 (102 mV dec<sup>-1</sup>) and S-2-T6 (96 mV dec<sup>-1</sup>) (Figure S25b).

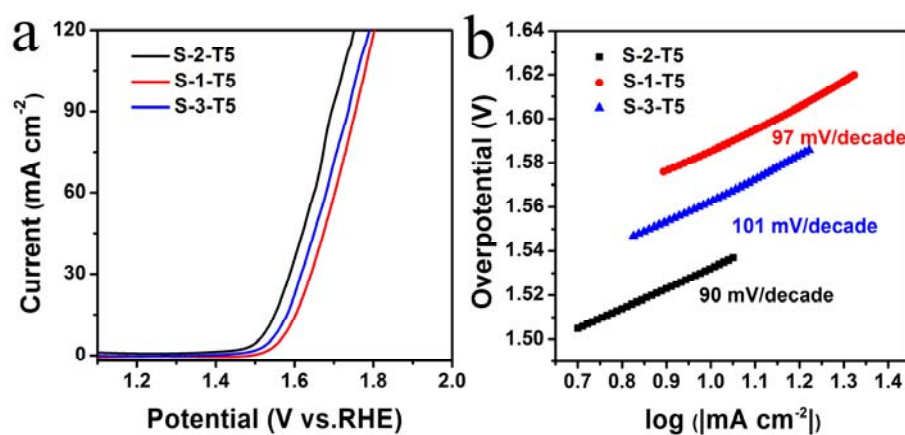

**Figure S26.** (a) Polarization curves. (b) Tafel plots of the S-1-T5, S-2-T5 and S-3-T5 at 1.0 M KOH, respectively.

The comparison shows that the OER performance of S-2-T5 is better than that of S-1-T5 and S-3-T5. The S-2-T5 affords overpotential of 302 mV at  $10 \text{ mA cm}^{-2}$ , which are much lower than S-1-T5 (356 mV) and S-3-T5 (333 mV) (Figure S26a). The Tafel slope of S-2-T5 is  $90 \text{ mV dec}^{-1}$ , which is also lower than S-1-T5 ( $97 \text{ mV dec}^{-1}$ ) and S-3-T5 ( $101 \text{ mV dec}^{-1}$ ) (Figure S26b).

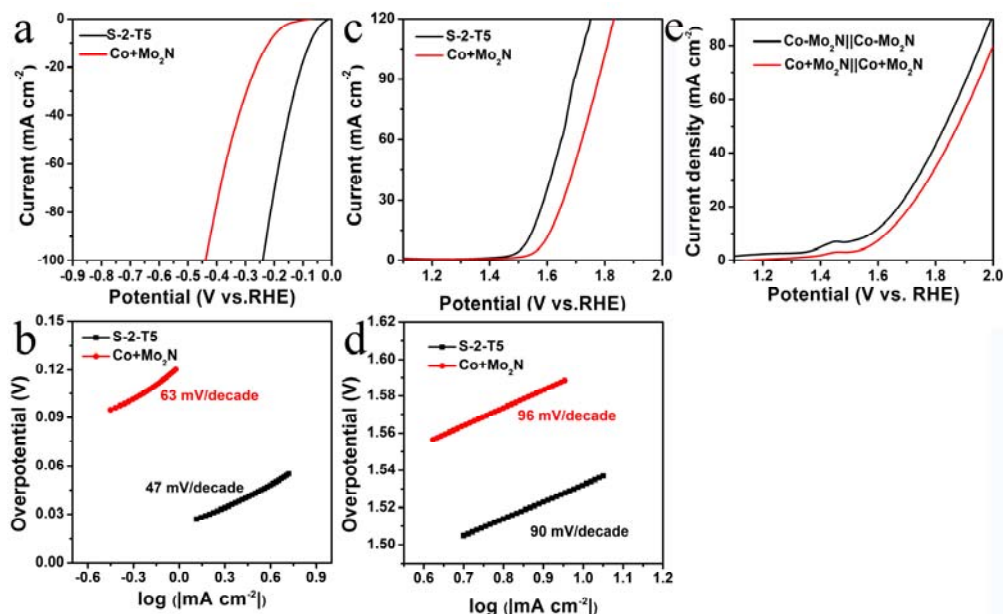

**Figure S27.** (a) Polarization curves and (b) Tafel plots of S-2-T5 and Co+Mo<sub>2</sub>N in 1 M KOH for the HER at a scan rate of 5 mV s<sup>-1</sup>. (c) Polarization curves and (d) Tafel plots of S-2-T5 and Co+Mo<sub>2</sub>N in 1 M KOH for the OER at a scan rate of 5 mV s<sup>-1</sup>. (e) Linear sweeping voltammetry curve of S-2-T5 as OER and HER bifunctional catalyst in 1.0 M KOH for overall water splitting, and Co+Mo<sub>2</sub>N||Co+Mo<sub>2</sub>N for overall water splitting.

As control, the catalyst from physical mixing of Mo<sub>2</sub>N and Co is prepared and used as catalyst for HER and OER reaction. Figure S27a and S27b show the Polarization curves and Tafel plots of Co + Mo<sub>2</sub>N in 1 M KOH for the HER. For clarification, the curves corresponding to S-2-T5 are also added. The comparison shows that the HER performance of S-2-T5 is better than that of Co+Mo<sub>2</sub>N. The S-2-T5 affords overpotential of 76 mV at 10 mA cm<sup>-2</sup>, which is much lower than Co+Mo<sub>2</sub>N (356 mV) (Figure S27a). The Tafel slope of S-2-T5 is 47 mV dec<sup>-1</sup>, which is also lower than Co+Mo<sub>2</sub>N (63 mV dec<sup>-1</sup>) (Figure S27b). At the same time, the OER performance of S-2-T5 is better than that of Co+Mo<sub>2</sub>N (Figure S27c). The S-2-T5 affords overpotential of 302 mV at 10 mA cm<sup>-2</sup>, which is much lower than Co+Mo<sub>2</sub>N (373 mV) (Figure S27c). The Tafel slope of S-2-T5 is 90 mV dec<sup>-1</sup>, which is also lower than Co+Mo<sub>2</sub>N (96 mV dec<sup>-1</sup>) (Figure S27d). Finally, the S-2-T5 affords overpotential of 346 mV at 10 mA cm<sup>-2</sup> for the overall water splitting, which is much lower than Co+Mo<sub>2</sub>N (399 mV) (Figure S27e).

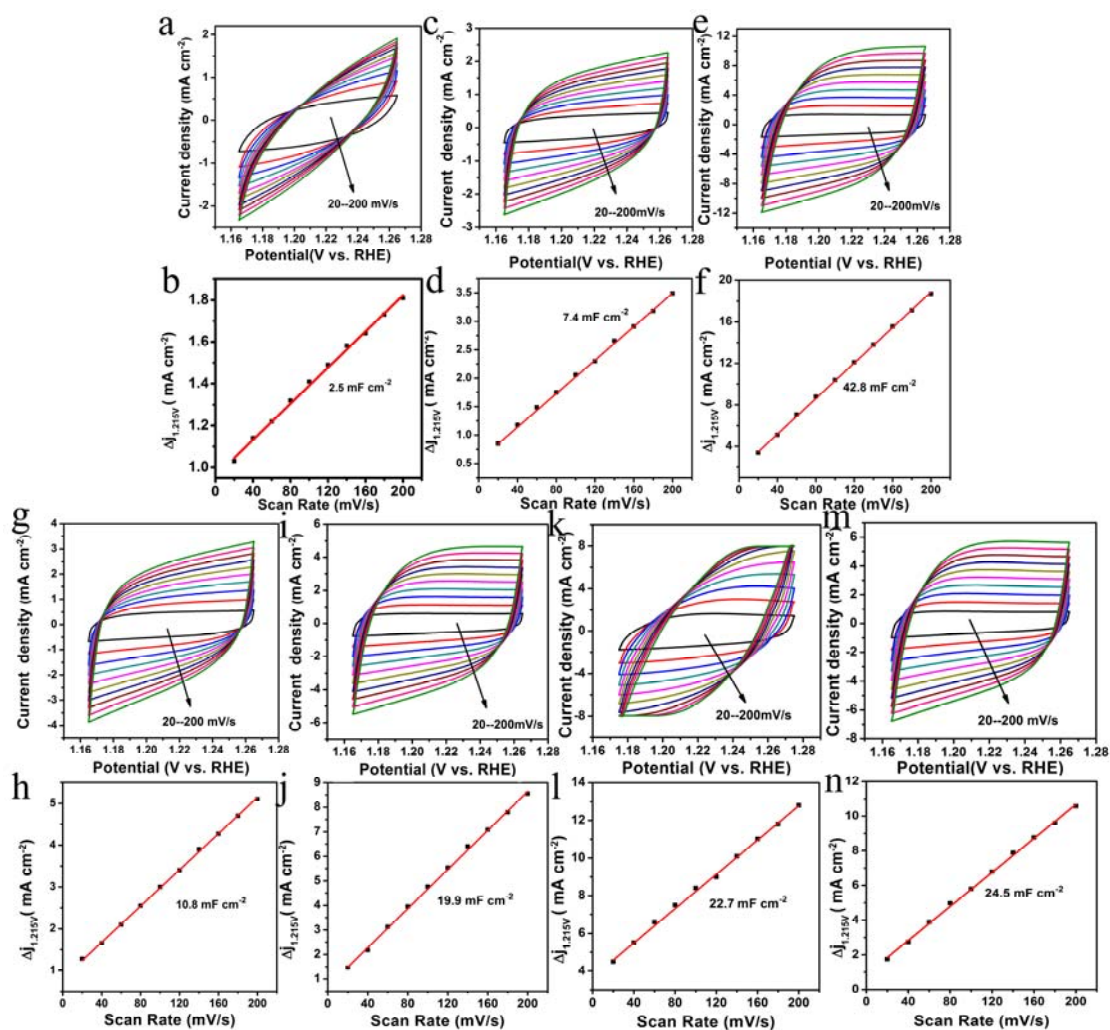

**Figure S28.** Cyclic voltammograms (CVs) in the region of 1.164 V-1.264 V with the different rates for (a) Mo-MOFs-T5; (c) ZIF-67-T5; (e) S-2-T5; (g) S-2-T4; (i) S-2-T6; (k) S-1-T5; (m) S-3-T5 in 1.0 M KOH. The capacitive current at 0.135 V as a function of scan rate for (b) Mo-MOFs-T5; (d) ZIF-67-T5; (f) S-2-T5; (h) S-2-T4; (j) S-2-T6; (l) S-1-T5; (n) S-3-T5, respectively ( $\Delta j_0 = j_a - j_c$ ).

In order to directly illustrate that the material has better electrocatalytic oxygen evolution performance. We also performed the electrocatalytic oxygen double-layer capacitance test to give the electrochemically surface area (ECSA) of different materials. The capacitance of S-2-T5 is about  $42.8 \text{ mF cm}^{-2}$ , much higher than ZIF-67-T5 ( $7.4 \text{ mF cm}^{-2}$ ), Mo-MOFs-T5 ( $2.5 \text{ mF cm}^{-2}$ ), S-2-T4 ( $10.8 \text{ mF cm}^{-2}$ ), S-2-T6 ( $19.9 \text{ mF cm}^{-2}$ ), S-1-T5 ( $22.7 \text{ mF cm}^{-2}$ ) and S-3-T5 ( $24.5 \text{ mF cm}^{-2}$ ).

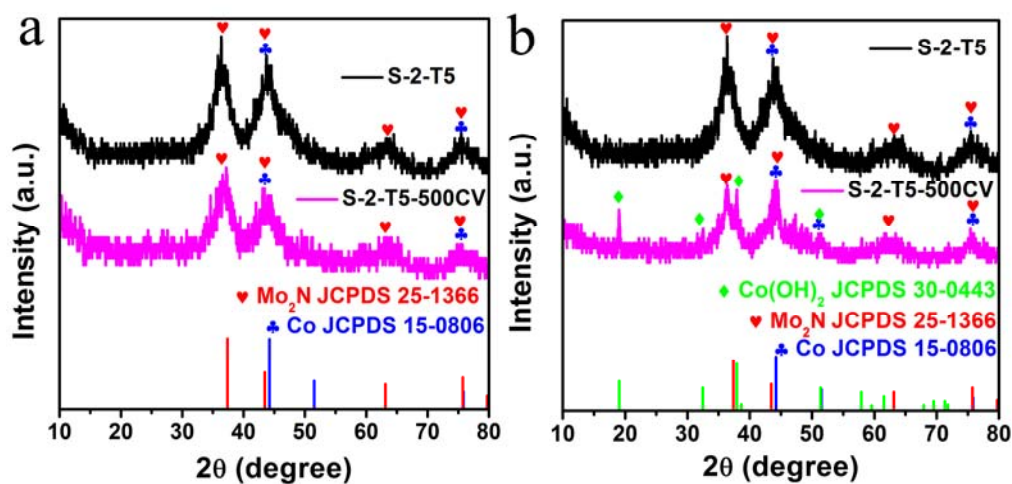

**Figure S29.** (a) XRD pattern of S-2-T5 after HER test (500 CV cycles). (b) XRD pattern of S-2-T5 after OER test (500 CV cycles).

Figure S29a shows XRD pattern of S-2-T5 after HER test (500 CV cycles). It is shown that the catalysts have no obvious change after HER test. Figure S29b shows XRD pattern of S-2-T5 after OER test (500CV). In addition to the characteristic peaks of molybdenum nitride and cobalt, a characteristic peak of  $\text{Co}(\text{OH})_2$  is also present in the material S-2-T5-500CV. The XRD diffraction peaks are consistent at  $2\theta = 19.06^\circ$ ,  $32.47^\circ$ ,  $37.92^\circ$  and  $51.36^\circ$  can be indexed to the (001), (100), (101) and (102) facets of  $\text{Co}(\text{OH})_2$  (JCPDS 30-0443).



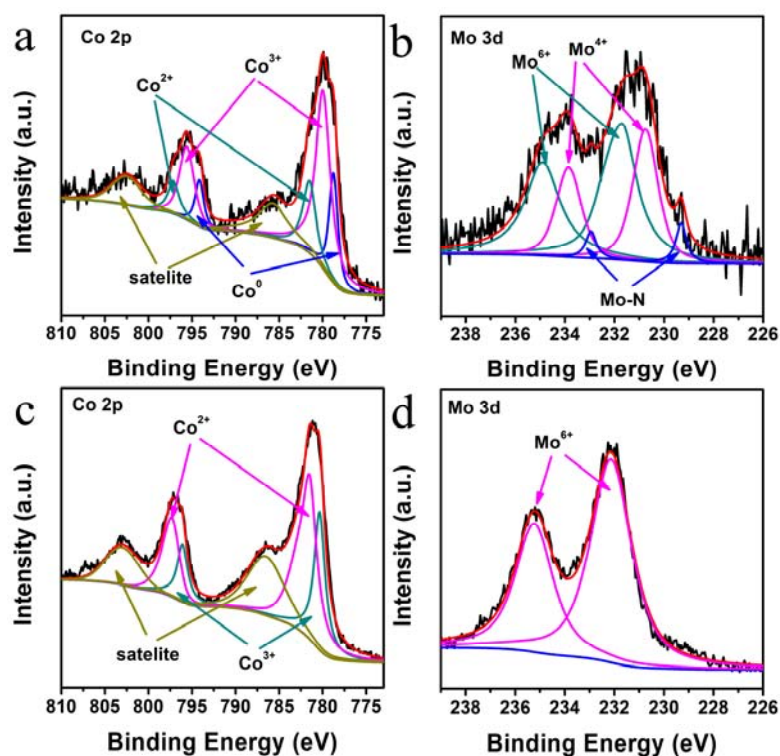

**Figure S30.** The XPS of (a) Co 2p and (b) Mo 3d of S-2-T5 after HER test (500 CV cycles); (c) Co 2p and (d) Mo 3d of S-2-T5 after OER test (500 CV cycles).

Figure S30a shows high-resolution XPS spectrum of Co element of S-2-T5 after HER test, which is similar to that of original S-2-T5. Specifically, the spin-orbit splitting is approximately 15.8 eV, which indicates the co-existence of Co (II) and Co (III). The peaks at about 781.2 eV and 797.1 eV correspond to Co  $2p_{3/2}$  and Co  $2p_{1/2}$  of  $\text{Co}^{2+}$ , respectively, which are accompanied by a couple of satellite peaks located at 785.7 eV and 802.5 eV. The BE at about 779.9 eV and 795.6 eV are attributed to Co  $2p_{3/2}$  and Co  $2p_{1/2}$  of  $\text{Co}^{3+}$ . The peaks located at 778.7 eV and 794.1 eV in Co 2p spectrum represent  $\text{Co}^0$   $2p_{3/2}$  and  $\text{Co}^0$   $2p_{1/2}$ , respectively. The results indicate good stability of Co in HER test. For Mo XPS, we can observe the decrease of N-Mo peak and increase of  $\text{Mo}^{4+}$  and  $\text{Mo}^{6+}$  peaks (Figure S30b). The peaks at the binding energies (BE) of 229.3 eV and 233.0 eV are classified as Mo  $3d_{5/2}$  and Mo  $3d_{3/2}$  of  $\text{Mo}^{4+}$ . The peaks at BE of 231.7 eV and 234.9 eV are attributed to Mo  $3d_{5/2}$  and Mo  $3d_{3/2}$  of  $\text{Mo}^{6+}$ . The binding peaks at 229.3 eV and 232.9 eV are defined as the BE of the Mo-N bond. The change should be ascribed to the formation of hydroxyl on  $\text{Mo}_2\text{N}$  in KOH solution. Similar phenomenon have been observed for NiCoP.<sup>21</sup>

The high resolution XPS spectra of the Co element of S-2-T5 after OER test



shows that the Co 2p spectra can be fitted into six peaks (Figure S30c). The two peaks at 780.4 and 796.1 eV corresponding to the  $2p_{3/2}$  and  $2p_{5/2}$  of  $\text{Co}^{3+}$ . The peaks related to  $\text{Co}^{2+}$   $2p_{3/2}$  and  $2p_{5/2}$  are located at 781.5 and 797.3 eV, which are accompanied by a couple of satellite peaks located at 786.3 eV and 803.0 eV. The XPS of  $\text{Co}^{2+}$  and  $\text{Co}^{3+}$  can be ascribed to  $\text{Co}(\text{OH})_2$ , being consistent with XRD result. High resolution XPS spectra of Mo elements of S-2-T5 after OER test are shown in Figure S30d. The Mo 3d spectra can be fitted into two peaks. The peaks at the binding energies of 232.1 eV and 235.2 eV are attributed to Mo  $3d_{5/2}$  and Mo  $3d_{3/2}$  of  $\text{Mo}^{6+}$ . The  $\text{Mo}_2\text{N}$  is oxidized to the high-valence Mo species ( $\text{Mo}^{6+}$ ) during OER process in alkaline solution. The presence of high-valence species is also favorable to improve the activity of catalyst. The results are also observed in previous reports.<sup>9,24</sup>

**Table S1.** The naming and experimental parameters of samples

| Sample           | Feed ratio of Mo-MOFs to Co | calcination temperature (°C) | Samples name |
|------------------|-----------------------------|------------------------------|--------------|
| Mo-MOFs          | /                           | 500                          | Mo-MOFs-T5   |
| ZIF-67           | /                           | 500                          | ZIF-67-T5    |
| ZIF-67/Mo-MOFs-2 | 2:20                        | 400                          | S-2-T4       |
|                  | 2:20                        | 500                          | S-2-T5       |
|                  | 2:20                        | 600                          | S-2-T6       |
| ZIF-67/Mo-MOFs-1 | 1:20                        | 500                          | S-1-T5       |
| ZIF-67/Mo-MOFs-3 | 3:20                        | 500                          | S-3-T5       |

**Table S2.** Elements and content in ZIF-67/Mo-MOFs-2, S-2-T5, Mo-MOFs-T5 and ZIF-67-T5 samples tested by XPS.

| Sample                  | Atomic Conc % |       |       |       |       |
|-------------------------|---------------|-------|-------|-------|-------|
|                         | Co 2p         | O 1s  | N 1s  | C 1s  | Mo 3d |
| <b>ZIF-67/Mo-MOFs-2</b> | 3.60          | 11.27 | 17.46 | 65.11 | 2.56  |
| <b>ZIF-67-T5</b>        | 5.28          | 6.89  | 8.58  | 79.25 | 0.00  |
| <b>Mo-MOFs-T5</b>       | 0.00          | 16.91 | 40.98 | 31.64 | 10.47 |
| <b>S-2-T5</b>           | 15.15         | 24.23 | 11.40 | 46.13 | 2.80  |

**Table S3.** Elements and content in ZIF-67/Mo-MOFs-2, S-2-T5, Mo-MOFs-T5 and ZIF-67-T5 samples tested by XPS.

| Sample                  | Mass Conc % |       |       |       |       |
|-------------------------|-------------|-------|-------|-------|-------|
|                         | Co 2p       | O 1s  | N 1s  | C 1s  | Mo 3d |
| <b>ZIF-67/Mo-MOFs-2</b> | 12.74       | 10.83 | 14.69 | 45.97 | 14.76 |
| <b>ZIF-67-T5</b>        | 20.85       | 7.38  | 8.04  | 63.73 | 0.00  |
| <b>Mo-MOFs-T5</b>       | 0.00        | 12.14 | 25.75 | 17.05 | 45.06 |
| <b>S-2-T5</b>           | 39.38       | 17.31 | 7.04  | 24.44 | 11.84 |

**Table S4.** BET surface areas of the prepared samples.

| Sample                  | Surface Area (m <sup>2</sup> g <sup>-1</sup> ) |
|-------------------------|------------------------------------------------|
| <b>Mo-MOFs</b>          | 6                                              |
| <b>ZIF-67</b>           | 1512                                           |
| <b>ZIF-67/Mo-MOFs-2</b> | 1143                                           |
| <b>Mo-MOFs-T5</b>       | 57                                             |
| <b>ZIF-67-T5</b>        | 6                                              |
| <b>S-2-T5</b>           | 9                                              |

**Table S5.** The summary of the catalytic performance of various catalysts for HER.

| Samples           | $\eta_0$<br>(mV) | $\eta_{10}$<br>(mV) | $\eta_{20}$<br>(mV) | $\eta_{50}$<br>(mV) | $\eta_{100}$<br>(mV) | Tafel slope<br>(mV dec <sup>-1</sup> ) | $j_0$<br>(mAcm <sup>-2</sup> ) |
|-------------------|------------------|---------------------|---------------------|---------------------|----------------------|----------------------------------------|--------------------------------|
| <b>S-2-T5</b>     | <b>23</b>        | <b>76</b>           | <b>106</b>          | <b>167</b>          | <b>240</b>           | <b>47</b>                              | <b>0.302</b>                   |
| <b>Mo-MOFs-T5</b> | 155              | 296                 | 344                 | 427                 | 517                  | 61                                     | 0.025                          |
| <b>ZIF-67-T5</b>  | 72               | 180                 | 221                 | 295                 | 377                  | 87                                     | 0.019                          |
| <b>Pt/C</b>       | 2                | 32                  | 48                  | 92                  | 158                  | 31                                     | /                              |
| <b>S-1-T5</b>     | 48               | 93                  | 129                 | 200                 | 280                  | 66                                     | /                              |
| <b>S-3-T5</b>     | 39               | 87                  | 121                 | 186                 | 261                  | 61                                     | /                              |
| <b>S-2-T4</b>     | 32               | 106                 | 144                 | 215                 | 293                  | 58                                     | /                              |
| <b>S-2-T6</b>     | 38               | 110                 | 152                 | 232                 | 320                  | 59                                     | /                              |

**Table S6.** The summary of the catalytic performance of various catalysts for OER.

| Samples                | $\eta_{10}$<br>(mV) | $\eta_{20}$<br>(mV) | $\eta_{50}$<br>(mV) | $\eta_{100}$<br>(mV) | Tafel slope<br>(mV dec <sup>-1</sup> ) |
|------------------------|---------------------|---------------------|---------------------|----------------------|----------------------------------------|
| <b>S-2-T5</b>          | <b>302</b>          | <b>334</b>          | <b>400</b>          | <b>485</b>           | <b>90</b>                              |
| <b>Mo-MOFs-T5</b>      | 407                 | 442                 | 509                 | 604                  | 93                                     |
| <b>ZIF-67-T5</b>       | 387                 | 422                 | 488                 | 581                  | 92                                     |
| <b>RuO<sub>2</sub></b> | 355                 | 389                 | 456                 | 546                  | 104                                    |
| <b>S-1-T5</b>          | 356                 | 387                 | 453                 | 541                  | 97                                     |
| <b>S-3-T5</b>          | 333                 | 365                 | 430                 | 522                  | 101                                    |
| <b>S-2-T4</b>          | 348                 | 378                 | 439                 | 525                  | 102                                    |
| <b>S-2-T6</b>          | 312                 | 346                 | 441                 | 514                  | 96                                     |

**Table S7.** The summary of the catalytic performance of various catalysts for overall water splitting.

| Samples                                       | $\eta_{10}$ (V) | $\eta_{20}$ (V) | $\eta_{50}$ (V) |
|-----------------------------------------------|-----------------|-----------------|-----------------|
| <b>Co-Mo<sub>2</sub>N  Co-Mo<sub>2</sub>N</b> | <b>1.576</b>    | <b>1.671</b>    | <b>1.832</b>    |
| <b>Pt/C  RuO<sub>2</sub></b>                  | 1.630           | 1.701           | 1.855           |

**Table S8.** The summary of the performance of different catalysts for HER.

| Catalyst                                              | Tafel slope<br>(mVdec <sup>-1</sup> ) | $\eta_{10}$<br>(mV) | Electrolyte                          | References       |
|-------------------------------------------------------|---------------------------------------|---------------------|--------------------------------------|------------------|
| <b>S-2-T5</b>                                         | <b>47</b>                             | <b>23</b>           | <b>1 M KOH</b>                       | <b>This work</b> |
| MoN-NC                                                | 54                                    | 42                  | 0.5M H <sub>2</sub> SO <sub>4</sub>  | 1                |
| MoC <sub>x</sub>                                      | 59                                    | 151                 | 1 M KOH                              | 2                |
| MoO <sub>2</sub> @PC-RGO                              | 41                                    | 64                  | 0.5M H <sub>2</sub> SO <sub>4</sub>  | 3                |
| Mo <sub>2</sub> C@NPC/NPRGO                           | 33.6                                  | 34                  | 0.5M H <sub>2</sub> SO <sub>4</sub>  | 4                |
| Co-Mo <sub>2</sub> C                                  | 39                                    | 38                  | 0.5M H <sub>2</sub> SO <sub>4</sub>  | 5                |
| Mo <sub>2</sub> N/NC                                  | 115.7                                 | 151                 | 0.5M H <sub>2</sub> SO <sub>4</sub>  | 6                |
| Mo <sub>2</sub> N- Mo <sub>2</sub> S                  | 59                                    | 190                 | 0.5M H <sub>2</sub> SO <sub>4</sub>  | 7                |
| MoP/rGO                                               | 72                                    | 140                 | 1 M KOH                              | 8                |
| MoP/rGO                                               | 58                                    | 119                 | 0.5M H <sub>2</sub> SO <sub>4</sub>  | 8                |
| WN- Mo <sub>2</sub> N/CNTs                            | 115                                   | 315                 | 0.5M H <sub>2</sub> SO <sub>4</sub>  | 9                |
| HF-MoSP                                               | 85                                    | 119                 | 1 M KOH                              | 10               |
| HF-MoSP                                               | 29                                    | 108                 | 0.5M H <sub>2</sub> SO <sub>4</sub>  | 10               |
| Fe <sub>3</sub> C/ Mo <sub>2</sub> C<br>@NPGC         | 45.2                                  | 150                 | 0.5M H <sub>2</sub> SO <sub>4</sub>  | 11               |
| MoC <sub>x</sub> @C                                   | 56                                    | 79                  | 0.5M H <sub>2</sub> SO <sub>4</sub>  | 12               |
| MoP@PC                                                | 66                                    | 153                 | 0.5M H <sub>2</sub> SO <sub>4</sub>  | 13               |
| MoNi <sub>4</sub> / MoO <sub>3-x</sub>                | 36                                    | 17                  | 1 M KOH                              | 14               |
| Co-N- MoO <sub>2</sub>                                | 126.8                                 | 258                 | 0.1 M KOH                            | 15               |
| Ni <sub>3</sub> N-NiMoN-5                             | 64                                    | 31                  | 1 M KOH                              | 22               |
| Ni <sub>2</sub> P/Ni/NF                               | 72                                    | 98                  | 1 M KOH                              | 23               |
| NiCo <sub>2</sub> O <sub>4</sub><br>(iR compensation) | 49.7                                  | 50                  | 1 M KOH                              | 24               |
| MoO <sub>2</sub> /Ni foam                             | 41                                    | 25                  | 1 M KOH                              | 25               |
| Co-P/NC-based                                         | 51                                    | 191                 | 1 M KOH                              | 26               |
| MoS <sub>2</sub> /Ni <sub>3</sub> S <sub>2</sub>      | 81                                    | 110                 | 1 M KOH                              | 27               |
| Ni <sub>5</sub> P <sub>4</sub>                        | 40                                    | 140                 | 1 M KOH                              | 28               |
| Ni <sub>5</sub> P <sub>4</sub>                        | 53                                    | 150                 | 0.5 M H <sub>2</sub> SO <sub>4</sub> | 28               |
| NiMoN-550                                             | 79                                    | 89                  | 1 M KOH                              | 30               |
| NC@CuCo <sub>2</sub> N <sub>x</sub> /CF               | 76                                    | 105                 | 1 M KOH                              | 31               |
| NiMoP <sub>2</sub>                                    | 56                                    | 195                 | 0.5 M H <sub>2</sub> SO <sub>4</sub> | 32               |

**Table S9.** The summary of the performance of different catalysts for OER.

| Catalyst                                               | Tafel slope<br>(mVdec <sup>-1</sup> ) | $\eta_{10}$<br>(mV) | Electrolyte    | References       |
|--------------------------------------------------------|---------------------------------------|---------------------|----------------|------------------|
| <b>S-2-T5</b>                                          | <b>90</b>                             | <b>302</b>          | <b>1 M KOH</b> | <b>This work</b> |
| NiCo-POM/Ni                                            | 126                                   | 360                 | 0.1 M KOH      | 16               |
| CoO <sub>x</sub> -MoC/NC-2                             | 89.8                                  | 330                 | 1 M KOH        | 17               |
| CoNC@MoS <sub>2</sub> /CNF films                       | 51.9                                  | 350                 | 1 M KOH        | 18               |
| Co-P/NC-based                                          | 52                                    | 354                 | 1 M KOH        | 19               |
| Co <sub>9</sub> S <sub>8</sub> @MoS <sub>2</sub> /CNFs | 61                                    | 430                 | 1 M KOH        | 20               |
| NiMo HNRs/TiM                                          | 47                                    | 310                 | 1 M KOH        | 21               |
| Ni <sub>3</sub> N-NiMoN-5                              | 118                                   | 277                 | 1 M KOH        | 22               |
| Ni <sub>2</sub> P/Ni/NF                                | /                                     | 200                 | 1 M KOH        | 23               |
| NiCo <sub>2</sub> O <sub>4</sub><br>(iR compensation)  | 53                                    | 1.52                | 1 M NaOH       | 24               |
| MoO <sub>2</sub> /Ni foam                              | 54                                    | 1.49                | 1 M KOH        | 25               |
| Co-P/NC-based                                          | 52                                    | 354                 | 1 M KOH        | 26               |
| MoS <sub>2</sub> /Ni <sub>3</sub> S <sub>2</sub>       | 88                                    | 218                 | 1 M KOH        | 27               |
| Ni <sub>5</sub> P <sub>4</sub>                         | /                                     | 218                 | 1 M KOH        | 28               |
| Ni-P foam                                              | 23/179.9                              | 100                 | 1 M KOH        | 29               |
| NiMoN-550                                              | $\eta_{10}$ =295                      | 94                  | 1 M KOH        | 30               |
| NC@CuCo <sub>2</sub> N <sub>x</sub> /CF                | $\eta_{10}$ =230                      | 84                  | 1 M KOH        | 31               |
| NiMoP <sub>2</sub>                                     | $\eta_{20}$ =260                      | 90.6                | 1 M KOH        | 32               |

**Table S10.** The summary of the performance of different catalysts for overall water splitting in alkaline electrolytes.

| Catalyst                                         | Overall voltage<br>at 10 mAcm <sup>-2</sup> (V) | Electrolyte    | References       |
|--------------------------------------------------|-------------------------------------------------|----------------|------------------|
| <b>S-2-T5</b>                                    | <b>1.576</b>                                    | <b>1 M KOH</b> | <b>This work</b> |
| CoNC@MoS <sub>2</sub> /CNF films                 | 1.62                                            | 1 M KOH        | 18               |
| NiMo HNRs/TiM                                    | 1.64                                            | 1 M KOH        | 21               |
| Ni <sub>3</sub> N-NiMoN-5                        | 1.54                                            | 1 M KOH        | 22               |
| Ni <sub>2</sub> P/Ni/NF                          | 1.49                                            | 1 M KOH        | 23               |
| NiCo <sub>2</sub> O <sub>4</sub>                 | 1.65                                            | 1 M NaOH       | 24               |
| MoO <sub>2</sub> /Ni foam                        | 1.53                                            | 1 M KOH        | 25               |
| Co-P/NC-based                                    | $\eta_{165}=2$                                  | 1 M KOH        | 26               |
| MoS <sub>2</sub> /Ni <sub>3</sub> S <sub>2</sub> | 1.56                                            | 1 M KOH        | 27               |
| Ni <sub>5</sub> P <sub>4</sub>                   | 1.7                                             | 1 M KOH        | 28               |
| Ni-P foam                                        | $\eta_5=1.44$                                   | 1 M KOH        | 29               |
| NiMoN-550                                        | 1.596                                           | 1 M KOH        | 30               |
| NC@CuCo <sub>2</sub> N <sub>x</sub> /CF          | 1.62                                            | 1 M KOH        | 31               |
| NiMoP <sub>2</sub>                               | 1.65                                            | 1 M KOH        | 32               |

## References

- 1 Y. P. Zhu, G. Chen, X. M. Xu, G. M. Yang, M. L. Liu and Z. P. Shao, *ACS Catal.*, 2017, **7**, 3540-3547.
- 2 H. B. Wu, B. Y. Xia, L. Yu, X.-Y. Yu and X. W. Lou, *Nature Communications*, 2015, **6**, 6512.
- 3 Y.-J. Tang, M.-R. Gao, C.-H. Liu, S.-L. Li, H.-L. Jiang, Y.-Q. Lan, M. Han and S.-H. Yu, *Angew. Chem. Int. Ed.*, 2015, **54**, 12928-12932.
- 4 J.-S. Li, Y. W, C.-H. Liu, S.-L. Li, Y.-G. Wang, L.-Z. Dong, Z.-H. Dai, Y.-F. Li and Y.-Q. Lan, *Nat Commun.*, 2016, **7**, 11204.
- 5 H. L. Lin, N. Liu, Z. P. Shi, Y. L. Guo, Y. Tang and Q. S. Gao, *Adv. Funct. Mater.*, 2016, **26**, 5590-5598.
- 6 Y.-J. Song and Z.-Y. Yuan, *Electrochimica Acta*, 2017, **246**, 536-543.
- 7 K. Ojha, S. Saha, S. Banerjee and A. K. Ganguli, *ACS Appl. Mater. Interfaces.*, 2017, **9**, 19455-19461.

- 8 H. J. Yan, Y. Q. Jiao, A. P. Wu, C. G. Tian, X. M. Zhang, L. Wang, Z. Y. Ren and H. G. Fu, *ChemComm.*, 2016, **52**, 9530-9533.
- 9 M. C. Meng, H. J. Yan, Y. Q. Jiao, A. P. Wu, X. M. Zhang, R. H. Wang and C. G. Tian, *RSC Adv.*, 2016, **6**, 29303-29307.
- 10 A. P. Wu, C. G. Tian, H. J. Yan, Y. Q. Jiao, Q. Yan, G. Y. Yang and H. G. Fu, *Nanoscale*, 2016, **8**, 11052-11059.
- 11 J.-S. Li, Y.-J. Tang, C.-H. Liu, S.-L. Li, R.-H. Li, L.-Z. Dong, Z.-H. Dai, J.-C. Bao and Y.-Q. Lan, *J. Mater. Chem. A.*, 2016, **4**, 1202-1207.
- 12 X. J. Yang, X. J. Feng, H. Q. Tan, H. Y. Zang, X. L. Wang, Y. H. Wang, E. Wang and Y. G. Li, *J. Mater. Chem. A.*, 2016, **4**, 3947-3954.
- 13 J. Yang, F. J. Zhang, X. Wang, D. S. He, G. Wu, Q. H. Yang, X. Hong, Y. Wu and Y. D. Li, *Angewandte Chemie*, 2016, **128**, 13046-13050.
- 14 Y.-Y. Chen, Y. Zhang, X. Zhang, T. Tang, H. Luo, S. A. Niu, Z.-H. Dai, L.-J. Wan and J.-S. Hu, *Advanced Materials*, 2017, **29**, 1703311.
- 15 L. J. Yang, J. Y. Yu, Z. Q. Wei, G. X. Li, L. D. Cao, W. J. Zhou and S. W. Chen, *Nano Energy*, 2017, **41**, 772-779.
- 16 W. J. Luo, J. Hu, H. L. Diao, B. Schwarz, C. Streb and Y.-F. Song, *Angewandte Chemie-International Edition*, 2017, **56**, 4941-4944.
- 17 T. Huang, Y. Chen and J.-M. Lee, *Small*, 2017, **13**, 1702753.
- 18 D. X. Ji, S. J. Peng, L. Fan, L. L. Li, X. H. Qin and S. Ramakrishna, *Journal of Materials Chemistry A*, 2017, **5**, 23898-23908.
- 19 B. You, N. Jiang, M. L. Sheng, S. Gul, J. Yano and Y. J. Sun, *Chemistry of materials*, 2015, **27**, 7636-7642.
- 20 H. Zhu, J. F. Zhang, R. P. Y-Z, M. L. Du, Q. F. Wang, G. H. Gao, J. D. Wu, G. M. Wu, M. Zhang, B. Liu, J. M. Yao and X. W. Zhang, *Advanced materials*, 2015, **27**, 4752-4759.
- 21 J. Q. Tian, N. Y. Cheng, Q. Liu, X. P. Sun, Y. Q. He and A. M. Asiri, *Journal of Materials Chemistry A*, 2015, **3**, 20056-20059.
- 22 A. P. Wu, Y. Xie, H. Ma, C. G. Tian, Y. Gu, H. J. Yan, X. M. Zhang, G. Y. Yang and H. G. Fu, *Nano Energy*, 2018, **44**, 353-363.
- 23 B. You, N. Jiang, M. L. Sheng, M. W. Bhushan and Y. J. Sun, *ACS Catalysis*, 2016, **6**, 714-721.
- 24 X. H. Gao, H. X. Zhang, Q. G. Li, X. G. Yu, Z. L. Hong, X. W. Zhang, C. D. Liang and Z. Lin, *Angewandte Chemie International Edition*, 2016, **55**, 6290-6294.

- 25 Y. S. Jin, H. T. Wang, J. J. Li, X. Yue, Y. J. Han, P. K. Shen and Y. Cui, *Advanced Materials*, 2016, **28**, 3785-3790.
- 26 B. You, N. Jiang, M. L. Sheng, S. Gul, J. Yano and Y. J. Sun, *Chemistry of materials*, 2015, **27**, 7636-7642.
- 27 J. Zhang, T. Wang, D. Pohl, B. Rellinghaus, R. H. Dong, S. H. Liu, X. D. Zhuang and X. L. Feng, *Angewandte Chemie-International Edition*, 2016, **128**, 6814-6819.
- 28 M. Ledendecker, S. K. Calderyn, C. Papp, H.-P. Steinruck, M. Antonietti and M. Shalom, *Angewandte Chemie-International Edition*, 2015, **127**, 12538-12542.
- 29 X. G. Wang, W. Li, D. H. Xiong and L. F. Liu, *Journal of Materials Chemistry A*, 2016, **4**, 5639-5646.
- 30 Z. X. Yin, Y. Sun, C. L. Zhu, C. Y. Li, X. T. Zhang and Y. J. Chen, *Journal of Materials Chemistry A*, 2017, **5**, 13648-13658.
- 31 J. Zheng, X. L. Chen, X. Zhong, S. Q. Li, T. Z. Liu, G. L. Zhuang, X. N. Li, S. W. Deng, D. H. Mei and J.-G. Wang, *Adv. Funct. Mater.*, 2017, **27**, 1704169.
- 32 X.-D. Wang, H.-Y. Chen, Y.-F. Xu, J.-F. Liao, B.-X. Chen, H.-S. Rao, D.-B. Kuang and C.-Y. Su, *Journal of Materials Chemistry A*, 2017, **5**, 7191-7199.
